# Supplementary material for: Thalamocortical functional connectivity in patients with insomnia using resting-state fMRI
Source: PubMed Central journal article supplement — J Psychiatry Neurosci. 2021 Nov 23;46(6):E639–46. doi: 10.1503/jpn.210066 (PMC8612467; doi:10.1503/jpn.210066), 2021-11-23
Supplement: 210006-1-at.pdf [file 210006-1-at.pdf]

Table 1. Studies including TMS-EMG outcomes

| Study                | Design          | Number of SCZ patients (N of males)                           | Patient characteristics           |                                                           |                                        |                                                                                                                                                                           |                                                                                           | Task                                                                                                                                                                                                                                                                                                | TMS protocol | Stimulation site                                                                                                                                                                                                    | Measures of cortical excitability                                                                                                                                                                                                                                                                                                                   | Summary of findings                                                                                                                    |  |
|----------------------|-----------------|---------------------------------------------------------------|-----------------------------------|-----------------------------------------------------------|----------------------------------------|---------------------------------------------------------------------------------------------------------------------------------------------------------------------------|-------------------------------------------------------------------------------------------|-----------------------------------------------------------------------------------------------------------------------------------------------------------------------------------------------------------------------------------------------------------------------------------------------------|--------------|---------------------------------------------------------------------------------------------------------------------------------------------------------------------------------------------------------------------|-----------------------------------------------------------------------------------------------------------------------------------------------------------------------------------------------------------------------------------------------------------------------------------------------------------------------------------------------------|----------------------------------------------------------------------------------------------------------------------------------------|--|
|                      |                 |                                                               | Age (years) (mean±SD)             | Illness duration (years) (mean±SD)                        | Clinical characteristics (mean±SD)     | Medications                                                                                                                                                               | Main findings                                                                             |                                                                                                                                                                                                                                                                                                     |              |                                                                                                                                                                                                                     |                                                                                                                                                                                                                                                                                                                                                     | Correlations                                                                                                                           |  |
| Chroni et al. (2002) | cross-sectional | 14 with SCZ<br>14 with major depression (MD)<br>14 with mania | 39 (SCZ)<br>48 (MD)<br>42 (mania) | 11.1 ± 9.8 (SCZ)<br>11.8 ± 9.2 (MD)<br>11.4 ± 9.1 (mania) | Clinical Global Impression Scale (CGI) | Antipsychotics (n=14), benzodiazepines (n=4), mood stabilizers (n=2), anticholinergics (n=11); remained on stable treatment regimens for at least 15 days before testing. | Participants were asked to perform an exercise involving the APB muscle of the right hand | At baseline, 5 stimuli trains (intensity = 115% of the participant's RMT, frequency = 0.3 Hz) were delivered with each train separated by 30 sec. Participants then asked to perform the "exercise" for 30 sec, followed immediately by a stimuli train, and this was repeated for another 4 times. | left M1      | RMT defined as the lowest intensity capable of producing a MEP ≥ 100 µV in 3/5 consecutive trials; MEP facilitation (%) = mean MEP following exercise / baseline mean MEP (MEP amplitude was measured peak-to-peak) | SCZ patients had significantly lower RMT than HCs. Mean MEPs showed a significant increase after exercise in the HCs but not in any of the 3 patient groups. The difference in mean post-exercise MEP facilitation was significant between HCs and each one of the patient groups, but was not significant between the 3 patient groups themselves. | post-exercise MEP facilitation in the 42 patients (all patient groups included) did not correlate with disease or medication duration. |  |

|                           |                                                                                                                                                                                                                                                                  |                                      |             |           |                                                  |                                                                                                                                                                                                                                    |     |                                                                                                                                                                                                                                                                 |         |                                                                                                                                         |                                                                                                                                                                                                                                                                                                                                                                                                                                                                                                                           |                                                                                                                                                                                                                                                                                                                                                                                                                                                                                                                  |
|---------------------------|------------------------------------------------------------------------------------------------------------------------------------------------------------------------------------------------------------------------------------------------------------------|--------------------------------------|-------------|-----------|--------------------------------------------------|------------------------------------------------------------------------------------------------------------------------------------------------------------------------------------------------------------------------------------|-----|-----------------------------------------------------------------------------------------------------------------------------------------------------------------------------------------------------------------------------------------------------------------|---------|-----------------------------------------------------------------------------------------------------------------------------------------|---------------------------------------------------------------------------------------------------------------------------------------------------------------------------------------------------------------------------------------------------------------------------------------------------------------------------------------------------------------------------------------------------------------------------------------------------------------------------------------------------------------------------|------------------------------------------------------------------------------------------------------------------------------------------------------------------------------------------------------------------------------------------------------------------------------------------------------------------------------------------------------------------------------------------------------------------------------------------------------------------------------------------------------------------|
| Kaster et al. (2015)      | Longitudinal, open-label study (a new antipsychotic was selected by the patient in consultation with their psychiatrist). TMS measurements were performed at baseline, and 6 weeks and 6 months after the new antipsychotic. HCs were only assessed at baseline. | 16 with medication resistance (11 M) | 33.3 ± 10.9 | 9.4 ± 7.4 | PANSS                                            | Medications at baseline: antipsychotics (n=14), antidepressants (n=6), benzodiazepines (n=5), mood stabilizers (n=2). Data was not available for 1 patient. All 16 patients were switched to clozapine after baseline measurements | N/A | CSP: muscle actively contract at 20% of maximum voluntary contraction, stimulation intensity = 140% RMT, ISI = 5 sec. SICI and ICF: CS = 80% RMT, TS was adjusted to produce mean peak-to-peak MEP amplitude of 1 mV, ISI = 2, 4 (SICI), 10, 15 and 20 (ICF) ms | left M1 | RMT; CSP duration; SICI and ICF: for both SICI and ICF the trials were averaged across the ISIs (e.g. for SICI it's 2 and 4 ms trials). | 11 patients remained in the study after 6 weeks and 6 months. In patients, mean RMT at baseline, 6 weeks, and 6 months were not significantly different. At baseline CSP duration between patients and HCs were not significantly different; in patients, CSP was significantly longer after 6 weeks of treatment with clozapine, whereas no significant difference was found from 6 weeks to 6 months. No significant difference in SICI and ICF between HCs, patients at baseline, patients at 6 weeks and at 6 months. | Response to clozapine was defined as 20% reduction in PANSS from baseline, (total score) 23% response rate by 6 weeks. No significant correlation between change in CSP (baseline to 6 weeks) with change in PANSS scores as measured by total, positive, or negative scale. No significant difference in CSP change between clozapine responders and non-responders at 6 weeks. No significant correlation between CSP change with clozapine dose at 6 weeks. Data for patients and HCs were pooled and found a |
| Fitzgerald et al. (2002a) | cross-sectional                                                                                                                                                                                                                                                  | 22 (17 M)                            | 28.8 ± 7.9  | N/A       | PANSS; Montgomery-Asberg Depression Rating Scale | All patients were receiving treatment with a single antipsychotic:                                                                                                                                                                 | N/A | CSP: stimulation was given at 10, 20, 30 and 40%                                                                                                                                                                                                                | left M1 | RMT; AMT (measured during a sustained contraction, 5–10% of                                                                             | No significant difference in RMT or AMT between patients and HCs. CSP duration was                                                                                                                                                                                                                                                                                                                                                                                                                                        | Data for patients and HCs were pooled and found a                                                                                                                                                                                                                                                                                                                                                                                                                                                                |

|                                                    |                                                                                                                                                                                                                                                       |                                                                                                                                                                                                                                                                                                                                     |                                                                                                                                                                                                                                                                                              |                                                                                                                                                                                                                                                                                                                                                                                                                                                                                                                                                                                                                                                                    |                                                                                                                                                                                                                                                                                                                                                                                                                                                                                                                                                                                                                                         |
|----------------------------------------------------|-------------------------------------------------------------------------------------------------------------------------------------------------------------------------------------------------------------------------------------------------------|-------------------------------------------------------------------------------------------------------------------------------------------------------------------------------------------------------------------------------------------------------------------------------------------------------------------------------------|----------------------------------------------------------------------------------------------------------------------------------------------------------------------------------------------------------------------------------------------------------------------------------------------|--------------------------------------------------------------------------------------------------------------------------------------------------------------------------------------------------------------------------------------------------------------------------------------------------------------------------------------------------------------------------------------------------------------------------------------------------------------------------------------------------------------------------------------------------------------------------------------------------------------------------------------------------------------------|-----------------------------------------------------------------------------------------------------------------------------------------------------------------------------------------------------------------------------------------------------------------------------------------------------------------------------------------------------------------------------------------------------------------------------------------------------------------------------------------------------------------------------------------------------------------------------------------------------------------------------------------|
| (MADRS);<br>Simpson-<br>Angus (SA)<br>rating scale | olanzapine<br>(n=14);<br>risperidone (n=8).<br>No concurrent use<br>of lithium, mood<br>stabilisers, or<br>other<br>antipsychotics.<br>Use of long-<br>acting or short-<br>acting<br>benzodiazepines<br>within 18h of<br>testing was not<br>permitted | above the<br>AMT<br>(sustained<br>contraction<br>of 5%<br>maximum).<br>SICI and<br>ICF: CS =<br>AMT minus<br>5%, TS was<br>set to<br>produce a<br>moderate<br>MEP<br>response<br>(0.5–1.0<br>mV), 10<br>trials for<br>each<br>condition<br>(i.e. single<br>TS and at<br>ISIs of 1, 2,<br>3, 4, 10, 15<br>and 20 ms),<br>ITI = 5 sec | maximum); CSP:<br>peak-to-peak<br>MEP size and<br>latency, and CSP<br>latency and<br>duration<br>(calculated as the<br>time of offset of<br>the EMG activity<br>suppression<br>minus the time of<br>onset); SICI &<br>ICF = conditioned<br>MEP amplitude /<br>unconditioned<br>MEP amplitude | significantly shorter<br>in patients at 10, 30<br>and 40% above the<br>AMT, no significant<br>difference in CSP<br>latency between<br>groups; and no<br>significant<br>difference in MEP<br>size or latency.<br>SICI: When the 4<br>ISIs for SICI were<br>pooled, there was a<br>significant reduction<br>in the degree of<br>inhibition in the<br>patient group<br>(patients 40.2%,<br>HCs 27.8%), but<br>when each ISI was<br>analysed separately,<br>the patients had less<br>SICI at each ISI but<br>the differences were<br>not significant. No<br>significant between-<br>group difference in<br>ICF in the pooled<br>data or at any of the<br>3 ISI levels. | significant<br>positive<br>correlation<br>between the<br>mean SICI<br>(average of the<br>4 ISIs) and the<br>CSP duration<br>at the 30 and<br>40% intensity<br>levels (30%<br>and 40%).<br>Also, a<br>significant<br>positive<br>correlation<br>between ICF<br>and the CSP<br>duration at 10<br>and 20%<br>intensity was<br>found. No<br>significant<br>correlation<br>between the<br>clinical ratings<br>and<br>medication<br>dose and the<br>TMS<br>measures. No<br>significant<br>correlation<br>between<br>duration of<br>treatment and<br>RMT, AMT,<br>CSP duration<br>and latency,<br>SICI and ICF,<br>but significant<br>positive |
|----------------------------------------------------|-------------------------------------------------------------------------------------------------------------------------------------------------------------------------------------------------------------------------------------------------------|-------------------------------------------------------------------------------------------------------------------------------------------------------------------------------------------------------------------------------------------------------------------------------------------------------------------------------------|----------------------------------------------------------------------------------------------------------------------------------------------------------------------------------------------------------------------------------------------------------------------------------------------|--------------------------------------------------------------------------------------------------------------------------------------------------------------------------------------------------------------------------------------------------------------------------------------------------------------------------------------------------------------------------------------------------------------------------------------------------------------------------------------------------------------------------------------------------------------------------------------------------------------------------------------------------------------------|-----------------------------------------------------------------------------------------------------------------------------------------------------------------------------------------------------------------------------------------------------------------------------------------------------------------------------------------------------------------------------------------------------------------------------------------------------------------------------------------------------------------------------------------------------------------------------------------------------------------------------------------|

|                   |                 |              |                                                                                                                                                        |     |                                                                                                            |                                                                                                                                                                                                                                               |     |                                                                                                                                                                                                                           |         |                                                                                                                                                                                                                     |                                                                                                                                                                                                                                                                                                                                                                                                                                                                                                                                                                                  |                                                                                                                                                                                                                                                                                                                                                                                         |
|-------------------|-----------------|--------------|--------------------------------------------------------------------------------------------------------------------------------------------------------|-----|------------------------------------------------------------------------------------------------------------|-----------------------------------------------------------------------------------------------------------------------------------------------------------------------------------------------------------------------------------------------|-----|---------------------------------------------------------------------------------------------------------------------------------------------------------------------------------------------------------------------------|---------|---------------------------------------------------------------------------------------------------------------------------------------------------------------------------------------------------------------------|----------------------------------------------------------------------------------------------------------------------------------------------------------------------------------------------------------------------------------------------------------------------------------------------------------------------------------------------------------------------------------------------------------------------------------------------------------------------------------------------------------------------------------------------------------------------------------|-----------------------------------------------------------------------------------------------------------------------------------------------------------------------------------------------------------------------------------------------------------------------------------------------------------------------------------------------------------------------------------------|
|                   |                 |              |                                                                                                                                                        |     |                                                                                                            |                                                                                                                                                                                                                                               |     |                                                                                                                                                                                                                           |         |                                                                                                                                                                                                                     |                                                                                                                                                                                                                                                                                                                                                                                                                                                                                                                                                                                  | correlation found between treatment duration and CSP-MEP size at 3 of the intensity levels (20%; 30%; 40%)                                                                                                                                                                                                                                                                              |
| Liu et al. (2009) | cross-sectional | 78 (69.2% M) | 36.35 ± 11.35 (all); 31.29 ± 8.83 (unmedicated); 37.88 ± 11.47 (Olanzapine/Quetiapine); 36.20 ± 13.63 (Risperidone/Typical); 35.11 ± 11.56 (clozapine) | N/A | PANSS; Abnormal Involuntary Movement Scale (AIMS); Simpson-Angus Scale (SAS); Barnes Akathisia Scale (BAS) | unmedicated (n=7); clozapine (n=19); olanzapine/quetiapine (n=20/12), risperidone/typical antipsychotics (n=12/8); anticholinergics (n=10), benzodiazepines (n=11), the distributions of use among the subgroups did not significantly differ | N/A | CSP: participant pinched the dynamometer at 20% of maximal contraction force, stimulation intensity = 140% RMT, ISI = 5 sec. SICI and ICF: CS = 80% RMT, TS was suprathreshold, ISI = 2, 4 (SICI), 10, 15 and 20 (ICF) ms | left M1 | RMT; unconditioned MEP size (a measure of motor excitability); absolute CSP duration = time from the MEP onset to the return of any voluntary muscular activity, SICI and ICF = conditioned MEP / unconditioned MEP | No significant difference in RMT or unconditioned MEP size between all patients (n=78) and HCs. Patients receiving clozapine had reduced SICI compared to HCs and patients taking other antipsychotics (n=52), but it did not differ between patients taking other antipsychotics and HCs. Among the 4 medication groups (unmedicated, Olanzapine/Quetiapine, Risperidone/Typical, clozapine): no significant difference in RMT, SICI or ICF among the groups, whereas the olanzapine/quetiapine group showed higher unconditioned MEP size compared to the risperidone/typicals | In all 78 patients (as one group): PANSS total score correlated positively with unconditioned MEP size and negatively with CSP duration; positive symptoms severity correlated positively with unconditioned MEP size and SICI; negative symptoms severity correlated positively with unconditioned MEP size and negatively with CSP duration; general psychopathology score correlated |

|                                                                                                                                                |                                                                                                                                                                                                                                                                                                                                                                                                                                                                                                                             |
|------------------------------------------------------------------------------------------------------------------------------------------------|-----------------------------------------------------------------------------------------------------------------------------------------------------------------------------------------------------------------------------------------------------------------------------------------------------------------------------------------------------------------------------------------------------------------------------------------------------------------------------------------------------------------------------|
| group; as for CSP duration, patients taking clozapine > HCs > olanzapine/quetiapin e group = risperidone/typical group > unmedicated patients. | positively with unconditioned MEP size and negatively with CSP duration; extrapyramidal and involuntary movements, as assessed by AIMS, SAS, and BAS, were not associated with RMT, SICI, or ICF. When the patients were split into medicated and unmedicated groups, significant positive correlation between PANSS total score and SICI in the unmedicated patients, but in the medicated patients no significant correlation between SICI and PANSS total or any subscale score. No significant correlation between SICI |
|------------------------------------------------------------------------------------------------------------------------------------------------|-----------------------------------------------------------------------------------------------------------------------------------------------------------------------------------------------------------------------------------------------------------------------------------------------------------------------------------------------------------------------------------------------------------------------------------------------------------------------------------------------------------------------------|

|                        |                 |                                               |                                       |            |                                                                             |                                                                                                                                                                                                                      |                                                                                                                                                                                                                                                                                                                                             |                                                                                                                                                                                                                                                                                                                                                                  |         |                                                                                                                                                                                                                                                                                                                                                                                       |                                                                                                                                                                                                                                                                                                                                                                                                                                                                                                                                                                                                                       |                                                                    |
|------------------------|-----------------|-----------------------------------------------|---------------------------------------|------------|-----------------------------------------------------------------------------|----------------------------------------------------------------------------------------------------------------------------------------------------------------------------------------------------------------------|---------------------------------------------------------------------------------------------------------------------------------------------------------------------------------------------------------------------------------------------------------------------------------------------------------------------------------------------|------------------------------------------------------------------------------------------------------------------------------------------------------------------------------------------------------------------------------------------------------------------------------------------------------------------------------------------------------------------|---------|---------------------------------------------------------------------------------------------------------------------------------------------------------------------------------------------------------------------------------------------------------------------------------------------------------------------------------------------------------------------------------------|-----------------------------------------------------------------------------------------------------------------------------------------------------------------------------------------------------------------------------------------------------------------------------------------------------------------------------------------------------------------------------------------------------------------------------------------------------------------------------------------------------------------------------------------------------------------------------------------------------------------------|--------------------------------------------------------------------|
| Lindberg et al. (2016) | cross-sectional | 28 with SCZ (24 M); 21 healthy siblings (9 M) | 32 ± 6.7 (SCZ); 31.5 ± 9.6 (siblings) | 14.2 ± 6.9 | PANSS; Simpson-Angus scale (SAS); Neurological Soft Signs scale (NSS); MMSE | 22 patients on stable (> 3 months) atypical antipsychotics (6 were taking clozapine) and 7 were non-medicated for at least 6 months. Patients on mood stabilizers, antidepressants or benzodiazepines were excluded. | Stop signal task: assessed the ability to inhibit a prepared action, 225 go trials (the gauge hit the target and participants had to lift the finger), and 105 stop trials (the gauge stopped before hitting the target and participants had to inhibit the finger lift response). The go trials had 2 conditions: "go early" and "go late" | CSP: stimulation given at 120% and 140% AMT while maintaining 10% muscle contraction. SICI was used to measure task-related changes in motor excitability (the TS alone trials) and inhibition (paired-pulse trials) during the "go early", "go late" and "stop" conditions of the stop signal task. TS intensity was initially set to induce a MEP of about 1.5 | left M1 | RMT (defined at rest as the lowest stimulus intensity that evoked MEPs of 100 µV in at least 5 of 10 trials); AMT (10% of maximal voluntary contraction); unconditioned MEP amplitude; CSP duration (defined as the time from MEP onset to the re-occurrence of continuous EMG activity); SICI = [1 minus (mean conditioned MEP amplitude / mean unconditioned MEP amplitude)] × 100. | No significant differences in RMT and AMT were found among patients, siblings and HCs. Unconditioned MEP size was significantly higher in Go late than Go early and Stop conditions in all 3 groups, but no significant difference among groups for each condition. CSP duration at 140% AMT was longer than at 120% AMT, but no significant difference across the 3 groups at either intensity. SICI was significantly lower in the Go late condition than the other 2 conditions, and significantly lower in patients than the other 2 groups in the Stop condition only. Inhibition success rate (for Stop trials) | and CSP duration in HCs, all patients or any medication subgroups. |
|------------------------|-----------------|-----------------------------------------------|---------------------------------------|------------|-----------------------------------------------------------------------------|----------------------------------------------------------------------------------------------------------------------------------------------------------------------------------------------------------------------|---------------------------------------------------------------------------------------------------------------------------------------------------------------------------------------------------------------------------------------------------------------------------------------------------------------------------------------------|------------------------------------------------------------------------------------------------------------------------------------------------------------------------------------------------------------------------------------------------------------------------------------------------------------------------------------------------------------------|---------|---------------------------------------------------------------------------------------------------------------------------------------------------------------------------------------------------------------------------------------------------------------------------------------------------------------------------------------------------------------------------------------|-----------------------------------------------------------------------------------------------------------------------------------------------------------------------------------------------------------------------------------------------------------------------------------------------------------------------------------------------------------------------------------------------------------------------------------------------------------------------------------------------------------------------------------------------------------------------------------------------------------------------|--------------------------------------------------------------------|

mV in the FDI at rest, then was adjusted to give reproducible MEPs on repeated Go trials and to a level where the participant was not disturbed by the stimulation. CS intensity was initially set to 90% AMT and was decreased to give 50% inhibition of the unconditioned MEP. Once the TS and CS were determined, the intensities were held constant for the duration of the experiment. ISI for paired-pulses = 3 ms

changed with stop time: shorter the stop time, bigger the difference in percentage correct inhibition across groups, and siblings had significantly higher successful inhibition rate across all stop times. No significant difference in stop-signal reaction time among groups.

|                         |                 |          |             |           |       |                                                                  |    |                                                                                                                                                                                                                                                                                                                                                                                                                                    |              |                                                                                                                                                                                                                                                                                                                                       |                                                                                                                                                                                                                                                                                            |     |
|-------------------------|-----------------|----------|-------------|-----------|-------|------------------------------------------------------------------|----|------------------------------------------------------------------------------------------------------------------------------------------------------------------------------------------------------------------------------------------------------------------------------------------------------------------------------------------------------------------------------------------------------------------------------------|--------------|---------------------------------------------------------------------------------------------------------------------------------------------------------------------------------------------------------------------------------------------------------------------------------------------------------------------------------------|--------------------------------------------------------------------------------------------------------------------------------------------------------------------------------------------------------------------------------------------------------------------------------------------|-----|
| Borojerdi et al. (1999) | cross-sectional | 10 (9 M) | 37.2 ± 10.8 | 7.8 ± 6.1 | PANSS | olanzapine or clozapine (n=7), flupenthixol or haloperidol (n=3) | NA | Ipsilateral silent period: for MEP latency assessment, the coil was placed on the contralateral M1, stimulation intensity = 50% above RMT with the muscle at rest; for measurement of TCI the coil was placed on the ipsilateral M1, stimuli applied at 0.2 Hz with the same intensity. Participants were asked to maintain maximal activation of their ipsilateral FDI muscle before and during the stimulation (relax muscle for | bilateral M1 | RMT (defined at rest as the lowest stimulus intensity that evoked MEPs of 100 µV in at least 5 of 10 trials); MEP latency in the contralateral FDI (a); onset latency of the inhibition of the FDI voluntary activity by ipsilateral stimulation (b); transcallosal conduction time = b minus a; duration of transcallosal inhibition | Data were pooled for the left and right sides (detected no significant side differences). No significant between group difference in RMT and MEP latency. Transcallosal conduction time was significantly delayed in patients and duration of TCI was significantly prolonged in patients. | N/A |
|-------------------------|-----------------|----------|-------------|-----------|-------|------------------------------------------------------------------|----|------------------------------------------------------------------------------------------------------------------------------------------------------------------------------------------------------------------------------------------------------------------------------------------------------------------------------------------------------------------------------------------------------------------------------------|--------------|---------------------------------------------------------------------------------------------------------------------------------------------------------------------------------------------------------------------------------------------------------------------------------------------------------------------------------------|--------------------------------------------------------------------------------------------------------------------------------------------------------------------------------------------------------------------------------------------------------------------------------------------|-----|

|                       |                 |           |               |                    |                                                                                                                                    |                                                                                                                                                                                                                                                             |     |                                                                                                                                                                                                                   |              |                                                                                                                                                                                                                                                                                                                                                                                                   |                                                                                                                                                                                                                                                                                          |                                                                                                                                                                                                                |
|-----------------------|-----------------|-----------|---------------|--------------------|------------------------------------------------------------------------------------------------------------------------------------|-------------------------------------------------------------------------------------------------------------------------------------------------------------------------------------------------------------------------------------------------------------|-----|-------------------------------------------------------------------------------------------------------------------------------------------------------------------------------------------------------------------|--------------|---------------------------------------------------------------------------------------------------------------------------------------------------------------------------------------------------------------------------------------------------------------------------------------------------------------------------------------------------------------------------------------------------|------------------------------------------------------------------------------------------------------------------------------------------------------------------------------------------------------------------------------------------------------------------------------------------|----------------------------------------------------------------------------------------------------------------------------------------------------------------------------------------------------------------|
| Du et al. (2019)      | cross-sectional | 24 (17 M) | 36.51 ± 13.51 | 14.59 ± 14.75      | Brief Psychiatric Rating scale (BPRS)                                                                                              | 4 patients were not taking antipsychotics; atypical antipsychotics (n=19); typical antipsychotics (n=2); 1 patient was on both typical & atypical antipsychotics. No patient was taking benzodiazepines                                                     | N/A | 2-3 sec after stimulation)<br>SICI: ISI = 1 and 3 ms, CS = 80% RMT, TS = 120% RMT, 24 TS alone and 24 paired pulses (CS-TS)                                                                                       | left M1      | RMT; unconditioned MEP amplitude (peak-to-peak); SICI = conditioned MEP / unconditioned MEP                                                                                                                                                                                                                                                                                                       | No significant difference in RMT and unconditioned MEP amplitude between patients and HCs. SICI was significantly reduced in patients; no significant difference in SICI between smokers and non-smokers in patients or HCs.                                                             | N/A                                                                                                                                                                                                            |
| Bajbouj et al. (2004) | cross-sectional | 16 (12 M) | 31.3 ± 10.5   | 57.8 ± 91.3 months | Brief Psychiatric Rating Scale (BPRS); PANSS; Global Assessment Scale (GAS); Extrapyramidal Motoric Symptom scale (EPS): 3.8 ± 5.7 | 5 patients were not taking antipsychotics or benzodiazepines; 11 were medicated: clozapine (n=2), olanzapine (n=2), haloperidol (n=3), pimozid (n=1), amisulpride (n=2), fluphenazine (n=1), none took anticonvulsants, mood stabilisers or benzodiazepines | N/A | Post-excitatory inhibition and Ipsilateral transcallosal inhibition: stimulation intensity = 80% of maximum stimulator output, stimulation was given with maximally sustained contraction of bilateral FDI muscle | bilateral M1 | RMT; duration of post-excitatory inhibition (from the onset of the EMG response to the end of the silent period, where the averaged tonic EMG activity again reaches the amplitude of the mean activity before the stimulus) in the contralateral FDI muscle; onset latency (the point where the averaged sustained EMG activity in the ipsilateral hand fell under the mean EMG amplitude before | Data from left and right hands were pooled since observed no significant side-to-side difference in patients or HCs. Durations of post-excitatory inhibition and of TCI were significantly longer in patients than HCs, whereas RMT and latency of TCI were not different between groups | Negative correlation between chlorpromazine equivalent and duration of post-excitatory inhibition was found. No significant correlation between the clinical scales and illness duration with the TMS measures |

|                           |                 |                                             |                                       |                                |                                                                                                                                       |                                                                                                                                                                                                                                                         |     |                                                                                                                                                                                                                                                                                                              |              |                                                                                                                                                                                                                                                                                                                                                                                                                                                            |                                                                                                                                                                                                                                                                                                                                                                                                                                                                                                                                             |     |
|---------------------------|-----------------|---------------------------------------------|---------------------------------------|--------------------------------|---------------------------------------------------------------------------------------------------------------------------------------|---------------------------------------------------------------------------------------------------------------------------------------------------------------------------------------------------------------------------------------------------------|-----|--------------------------------------------------------------------------------------------------------------------------------------------------------------------------------------------------------------------------------------------------------------------------------------------------------------|--------------|------------------------------------------------------------------------------------------------------------------------------------------------------------------------------------------------------------------------------------------------------------------------------------------------------------------------------------------------------------------------------------------------------------------------------------------------------------|---------------------------------------------------------------------------------------------------------------------------------------------------------------------------------------------------------------------------------------------------------------------------------------------------------------------------------------------------------------------------------------------------------------------------------------------------------------------------------------------------------------------------------------------|-----|
|                           |                 |                                             |                                       |                                |                                                                                                                                       |                                                                                                                                                                                                                                                         |     |                                                                                                                                                                                                                                                                                                              |              | the stimulus) and duration of transcallosal inhibition (measured from the onset latency until the EMG activity reaches the baseline level again) in ipsilateral muscle                                                                                                                                                                                                                                                                                     |                                                                                                                                                                                                                                                                                                                                                                                                                                                                                                                                             |     |
| Fitzgerald et al. (2002b) | cross-sectional | 20 olanzapine (17 M); 20 risperidone (15 M) | 28.1 ± 9.91 (olan); 28.2 ± 8.4 (risp) | olan 4.7 ± 6.2; risp 5.3 ± 7.1 | PANSS; Montgomery-Asberg Depression Rating Scale (MADRS); Abnormal Involuntary Movement Scale (AIMS); Assessment of Functioning (GAF) | Patients had been treated with their current dose for at least 14 days: olan mean dose 12.25 ± 6.1 mg, risp mean dose 4.1 ± 1.7 mg. Patients were not using lithium, mood stabilisers or other antipsychotics, or benzodiazepines within 18h or testing | N/A | MEP size and CSP: sustained contraction of 5% of maximum force, stimulation intensity = 10%, 20%, 30% and 40% of RMT, 10 stimuli for each intensity. SICI & ICF: TS was set to produce MEPs of 0.5–1.0 mV, CS = AMT - 5%, (TS alone and at ISI of 1, 2, 3, 4, 10, 15 and 20 ms), ITI = 5s. Single-pulse TCI: | bilateral M1 | RMT; AMT; peak-to-peak MEP size and latency; CSP duration (time that voluntary EMG activity reappeared minus the time of SP onset); SICI & ICF = conditioned MEP / unconditioned MEP. Onset and offset of single-pulse TCI (defined as the time points where the EMG trace fell persistently below and where it returned persistently to the baseline); single-pulse TCI duration (time of offset of TCI minus the onset). Dual-pulse TCI: resting TCI = % | The risp group showed higher RMT compared to the olan group. HCs had significantly longer CSP duration (higher the intensity, bigger the difference) than olan and risp groups but no significant difference between the 2 patient groups. Significant difference in single-pulse TCI duration between olan and HCs, and between olan and risp (HCs < olan > risp). Consistent SICI was seen at 1, 2, 3 and 4 ms and consistent ICF at 10 and 15 ms, no significant difference among the groups. For dual-pulse TCI, both medication groups | N/A |

|                                                                                                                                                                                                                                                                                                                                                                                                                                        |                                                                                                                                                                                                                                    |                                                                                                                                                                                                                                                                                                                       |
|----------------------------------------------------------------------------------------------------------------------------------------------------------------------------------------------------------------------------------------------------------------------------------------------------------------------------------------------------------------------------------------------------------------------------------------|------------------------------------------------------------------------------------------------------------------------------------------------------------------------------------------------------------------------------------|-----------------------------------------------------------------------------------------------------------------------------------------------------------------------------------------------------------------------------------------------------------------------------------------------------------------------|
| maximally sustained voluntary contraction on ipsilateral side of stimulation, applied at 155% of RMT. Paired-pulse TCI: 2 conditions - single TS to left M1, and a paired-pulse with the CS to the right M1 preceding the TS by 10 ms; the TS was set to produce a consistent MEPs of 0.5~1.5 mV in the contralateral APB muscle, CS = 125% RMT, the procedure was done twice, once at rest and once with the subject maintaining a 5% | reduction in the size of the MEP (peak-to-peak) in the TS alone condition vs paired-pulse condition; tonic TCI = MEP size of TS alone vs paired-condition, also duration of post-MEP silent period of TS alone vs paired-condition | showed significantly less reduction in MEP size in the paired condition at rest than HCs, but no difference between the medication groups. Also, the risp group showed significantly less reduction in the SP duration than olan group and HCs during tonic muscle contraction but no difference between olan and HCs |
|----------------------------------------------------------------------------------------------------------------------------------------------------------------------------------------------------------------------------------------------------------------------------------------------------------------------------------------------------------------------------------------------------------------------------------------|------------------------------------------------------------------------------------------------------------------------------------------------------------------------------------------------------------------------------------|-----------------------------------------------------------------------------------------------------------------------------------------------------------------------------------------------------------------------------------------------------------------------------------------------------------------------|

|                       |                 |                                                               |                                              |                                             |                                                                                   |                                                                                                                                                                                                                                                                                                                                                    |     |                                        |                                                                                                                                                                                                                                                                                                                                                                              |                                                                                                               |                                                                                                   |                                                                                                                                                                                                                                                                                                                                                |                                                                                                                                                                                                                                                                                                                                                                    |
|-----------------------|-----------------|---------------------------------------------------------------|----------------------------------------------|---------------------------------------------|-----------------------------------------------------------------------------------|----------------------------------------------------------------------------------------------------------------------------------------------------------------------------------------------------------------------------------------------------------------------------------------------------------------------------------------------------|-----|----------------------------------------|------------------------------------------------------------------------------------------------------------------------------------------------------------------------------------------------------------------------------------------------------------------------------------------------------------------------------------------------------------------------------|---------------------------------------------------------------------------------------------------------------|---------------------------------------------------------------------------------------------------|------------------------------------------------------------------------------------------------------------------------------------------------------------------------------------------------------------------------------------------------------------------------------------------------------------------------------------------------|--------------------------------------------------------------------------------------------------------------------------------------------------------------------------------------------------------------------------------------------------------------------------------------------------------------------------------------------------------------------|
| Ribolsi et al. (2011) | cross-sectional | 16 medicated (15 M); 9 unmedicated for at least 1 month (8 M) | medicated 41.6 ± 9.4; unmedicated 40.5 ± 9.4 | medicated: 19.2 ± 9.3; unmedicated 11 ± 8.8 | Brief Psychiatric Rating Scale (BPRS); PANSS; Global Assessment Functioning (GAF) | medicated patients were taking typical and atypical antipsychotics: aripiprazole (n = 3); haloperidol (n = 5); clozapine (n = 4); amisulpride (n = 4); chlorpromazine (n = 1); risperidone (n = 3); quetiapine (n = 2). Other medications: antidepressants (n=3), benzodiazepines (n=14), mood stabilizer (n=1). None had extrapyramidal symptoms. | N/A | sustained contraction of the right APB | TS intensity was adjusted to evoke a MEP of approx. 1 mV peak-to-peak in the relaxed left FDI, CS intensity = 110% RMT (inhibitory) or 80% AMT (facilitatory), ISI between CS and TS = 6, 8 and 15 ms, thus 4 conditions - TS alone and paired pulse with the 3 different ISIs, for each CS intensity, 20 pulses for TS alone and 10 trials for conditioned MEPs at each ISI | TS applied to the right M1; CS applied over left dorsal premotor cortex (defined as about 3cm anterior to M1) | RMT; AMT; peak-to-peak unconditioned MEP size; conditioned MEP size = % of unconditioned MEP size | No significant difference in RMT, AMT and unconditioned MEP size among medicated patients, unmedicated patients and HCs was found. Conditioned MEP size: medicated patients showed significantly less facilitation for CS = 80% AMT at ISI = 8 ms relative to HCs, for CS = 110% RMT; no significant difference among the 3 groups at any ISI. | Significant negative correlation between conditioned MEP size (at 80% AMT and 8 ms ISI) in patients and PANSS negative, but no correlation with PANSS positive, GAF, illness duration, (in medicated patients) chlorpromazine or diazepam. Regression analysis showed that conditioned MEP size was only predicted by PANSS negative score (standardized b = -.61) |
|-----------------------|-----------------|---------------------------------------------------------------|----------------------------------------------|---------------------------------------------|-----------------------------------------------------------------------------------|----------------------------------------------------------------------------------------------------------------------------------------------------------------------------------------------------------------------------------------------------------------------------------------------------------------------------------------------------|-----|----------------------------------------|------------------------------------------------------------------------------------------------------------------------------------------------------------------------------------------------------------------------------------------------------------------------------------------------------------------------------------------------------------------------------|---------------------------------------------------------------------------------------------------------------|---------------------------------------------------------------------------------------------------|------------------------------------------------------------------------------------------------------------------------------------------------------------------------------------------------------------------------------------------------------------------------------------------------------------------------------------------------|--------------------------------------------------------------------------------------------------------------------------------------------------------------------------------------------------------------------------------------------------------------------------------------------------------------------------------------------------------------------|

|                      |                                                                                                                                                                                                                                                                                                 |          |           |              |       |                                                                                                                                                                                                                                                                                          |     |                                                                                                                                                                                                                                                                     |         |                                                                                                                                                                                                                                                                             |                                                                                                                                                                                                                                                                                                                                                                                                                                                                                                                                                                                                                                                                                                                    |                                                                                                                                                                                                                                                                                                                                                                                                                                                                                                                                                 |
|----------------------|-------------------------------------------------------------------------------------------------------------------------------------------------------------------------------------------------------------------------------------------------------------------------------------------------|----------|-----------|--------------|-------|------------------------------------------------------------------------------------------------------------------------------------------------------------------------------------------------------------------------------------------------------------------------------------------|-----|---------------------------------------------------------------------------------------------------------------------------------------------------------------------------------------------------------------------------------------------------------------------|---------|-----------------------------------------------------------------------------------------------------------------------------------------------------------------------------------------------------------------------------------------------------------------------------|--------------------------------------------------------------------------------------------------------------------------------------------------------------------------------------------------------------------------------------------------------------------------------------------------------------------------------------------------------------------------------------------------------------------------------------------------------------------------------------------------------------------------------------------------------------------------------------------------------------------------------------------------------------------------------------------------------------------|-------------------------------------------------------------------------------------------------------------------------------------------------------------------------------------------------------------------------------------------------------------------------------------------------------------------------------------------------------------------------------------------------------------------------------------------------------------------------------------------------------------------------------------------------|
| Yildiz et al. (2015) | longitudinal : patients were followed up after 8 weeks to test the effect of a new atypical antipsychotic, TMS and PANSS administered on the 4th day (visit 1) of the new drug therapy, on the 5th day administered cognitive tests, 8 weeks later TMS, PANSS and cognitive tests were repeated | 13 (5 M) | 37.69 ± 9 | 12.31 ± 6.68 | PANSS | Patients were switched to a new atypical antipsychotic (due to symptoms exacerbation) by the start of the study, during the 8 weeks 6 were on clozapine, 3 olanzapine, 3 risperidone and 1 quetiapine. Prior to the study, 3 were medication naïve and the others were on antipsychotics | N/A | CSP: intensity = 120% RMT, 10 trials.<br>SICI & ICF: CS = sub-RMT, TS = supra-RMT, ISI = 1, 2, 3, 4, 5, 6 (for SICI) and 7, 8, 9, 10, 12, 14 (for ICF) ms. Single-pulse transcallosal inhibition (TCI): intensity = 155% RMT to the right ipsilateral M1, 10 trials | left M1 | RMT; CSP duration = time between the onset and the termination of the EMG suppression; SICI & ICF = (conditioned MEP amplitude / unconditioned MEP amplitude) x 100; TCI: duration of the ipsilateral silent period = time between the onset and the end of EMG suppression | 11 patients underwent repeat measurements at the end of the 8th week. Significant decrease in total, positive and general psychopathology scores after 8 weeks compared to baseline. No significant difference in RMT between HCs, and patients visit 1 & 2. CSP was significantly longer in the patients after 8 weeks relative to the baseline measurements in the controls. ICF was weaker in patients relative to HCs at the end of the 8th week for ISIs of 7, 8, 9, 10 and 12 ms; ICF significantly decreased at visit 2 compared to visit 1 for ISI of 14 ms. SICI did not differ between HCs and patients at visit 1 & 2 for any ISI. TCI was significantly longer in patients at visit 1 compared to HCs. | At visit 2, decreased SICI at 3 ms correlated with increasing chlorpromazine (higher the dose, larger the SICI). At visit 1, PANSS total and the general psychopathology scores were correlated with increased SICI (ISI 3 ms) (i.e. higher the PANSS scores, bigger the inhibition). SICI (ISI 3 ms) was also positively correlated with Visual Reproduction 1 and 2 test scores, the animal and name subtests of the Category Fluency Test, performance on the R-AVLT test with respect to the R-AVLT 1-5 cumulative learning test scores, R- |
|----------------------|-------------------------------------------------------------------------------------------------------------------------------------------------------------------------------------------------------------------------------------------------------------------------------------------------|----------|-----------|--------------|-------|------------------------------------------------------------------------------------------------------------------------------------------------------------------------------------------------------------------------------------------------------------------------------------------|-----|---------------------------------------------------------------------------------------------------------------------------------------------------------------------------------------------------------------------------------------------------------------------|---------|-----------------------------------------------------------------------------------------------------------------------------------------------------------------------------------------------------------------------------------------------------------------------------|--------------------------------------------------------------------------------------------------------------------------------------------------------------------------------------------------------------------------------------------------------------------------------------------------------------------------------------------------------------------------------------------------------------------------------------------------------------------------------------------------------------------------------------------------------------------------------------------------------------------------------------------------------------------------------------------------------------------|-------------------------------------------------------------------------------------------------------------------------------------------------------------------------------------------------------------------------------------------------------------------------------------------------------------------------------------------------------------------------------------------------------------------------------------------------------------------------------------------------------------------------------------------------|

AVLT 6 , R-  
AVLT 7  
delayed recall  
scores, R-  
AVLT correct  
recognition  
scores, and the  
R-AVLT  
discrimination  
scores; and  
negatively  
correlated with  
R-AVLT  
wrong  
recognition  
scores, and  
Stroop Test  
scores on the  
word-colour  
subtest time  
and mistakes.  
Between visits  
1 & 2,  
decrease in  
PANSS  
general  
psychopatholo  
gy was  
positively  
correlated with  
decrease in  
ICF (ISI 7 ms)  
and change in  
SICI (ISI 3  
ms) was  
correlated with  
changes in  
auditory verbal  
memory  
performance  
(positive  
correlation) as

| Author(s)              | Study Design    | Sample Size (n)                                 | Mean (SD)    | Duration             | Assessment                                                                                                 | Population                                                                                                                                  | Intervention                                                                                     | Stimulus                                                                                                                                                                 | Stimulus Intensity | Stimulus Location                                                                                                                                                                                                 | Outcome                                                                                                                                                                                                                                                                                                                       | Notes                                                                                                                                                                                          |
|------------------------|-----------------|-------------------------------------------------|--------------|----------------------|------------------------------------------------------------------------------------------------------------|---------------------------------------------------------------------------------------------------------------------------------------------|--------------------------------------------------------------------------------------------------|--------------------------------------------------------------------------------------------------------------------------------------------------------------------------|--------------------|-------------------------------------------------------------------------------------------------------------------------------------------------------------------------------------------------------------------|-------------------------------------------------------------------------------------------------------------------------------------------------------------------------------------------------------------------------------------------------------------------------------------------------------------------------------|------------------------------------------------------------------------------------------------------------------------------------------------------------------------------------------------|
| Ustohal et al. (2017)  | longitudinal    | 13 hospitalized patients with first-episode SCZ | 25.92 ± 4.81 | N/A                  | PANSS                                                                                                      | Patients were drug-naïve at baseline, no cytochrome P450 inhibitor or inductor, or benzodiazepines in the month before or during the study. | N/A                                                                                              | CSP: intensity = 150% RMT, measured over the moderately-activated right ADM muscle, CSP was assessed before risperidone treatment was initiated, and again 4 weeks later | left M1            | RMT; CSP duration = interval between the end of MEP and the return of voluntary EMG activity                                                                                                                      | CSP data were unavailable from 1 patient due to technical difficulties. Risperidone significant increased CSP duration after 4 weeks of treatment. Did not find a significant difference between smokers and non-smokers. RMT at baseline (45% of maximal output) and after 4 weeks (46.1% of maximal output) did not differ. | indicated by R-AVLT 7, and the Stroop Test word-colour subtest (negative correlation) .<br><br>No significant correlation between change in CSP duration and change in any PANSS scores        |
| Bagewadi et al. (2019) | cross-sectional | 45 (61.5% M)                                    | 28.6 ± 4.5   | 81.43 ± 57.35 months | Scale for the Assessment of Negative Symptoms (SANS); Scale for the Assessment of Positive Symptoms (SAPS) | the majority of patients were on atypical antipsychotics                                                                                    | Block 1 - rest; Block 2 - neutral action observation; Block 3 - context-based action observation | Single pulses were delivered with the intensity (SI-1mV) required to elicit ≥ 1 mV MEPs. SICI: CS = 80% RMT, TS = SI-1mV, ISI = 3 ms. ICF:                               | left M1            | RMT; SI-1mV and MEP size evoked by SI-1mV; SICI & ICF = [conditioned MEP/non-conditioned MEP] × 100; putative mirror neuron system (MNS) activity = (MCR during action observation - MCR during rest) x 100 / MCR | At block 1, RMT, SI-1mV and MEPs elicited by SI-1mV were similar between patients and HCs; patients had significantly lower ICF but similar SICI. Putative MNS activity was significantly greater during block 3 (block 3 minus block 1) than block 2 (block 2 minus                                                          | Social cognition was assessed using Social Cognition Rating Tools and Recognize Emotions in Neuropsychiatric Disorders. An average of individual test performance indices from these tests was |

|                    |                 |                     |              |             |       |                                                                                                   |     |                                                                                                                                                                                                                                                                                                                         |                                                                                                                                            |                                                                                                                                                                                    |                                                                                                                                                                                 |                                                                                                                                                                                      |
|--------------------|-----------------|---------------------|--------------|-------------|-------|---------------------------------------------------------------------------------------------------|-----|-------------------------------------------------------------------------------------------------------------------------------------------------------------------------------------------------------------------------------------------------------------------------------------------------------------------------|--------------------------------------------------------------------------------------------------------------------------------------------|------------------------------------------------------------------------------------------------------------------------------------------------------------------------------------|---------------------------------------------------------------------------------------------------------------------------------------------------------------------------------|--------------------------------------------------------------------------------------------------------------------------------------------------------------------------------------|
|                    |                 |                     |              |             |       |                                                                                                   |     | CS and TS same as SICI, ISI = 10 ms. Participants received 14 single pulses, 14 SICI and 14 ICF, ITI = 5 sec while observing each of the 3 blocks; in the 3rd block, stimuli were delivered in a time-locked manner to coincide with the last 70 sec of the video that depicted goal-directed actions of the FDI muscle |                                                                                                                                            | during rest, it measures the % change of cortical reactivity from block 1 to either block 2 or block 3, MCR stands for motor cortical reactivity and refers to MEP, SICI & ICF     | block 1) in both groups for MEP size, SICI & ICF; however, the increase in MNS activity during block 3 was bigger in HCs than patients in SI-1mV-MEP size and SICI but not ICF. | used to calculate the social cognition composite score. The social cognition composite score (n = 31) had a significant positive correlation with MNS-activity (ICF) during block 3. |
| Tang et al. (2014) | cross-sectional | 17 inpatients (9 M) | 31.71 ± 9.00 | 7.58 ± 4.72 | PANSS | All patients were taking antipsychotics, 14 on monotherapy, and 3 were receiving 2 antipsychotics | N/A | CSP left M1                                                                                                                                                                                                                                                                                                             | RMT; 1 mV-MEP size; CSP duration = time from MEP onset to the recovery of voluntary EMG activity; SICI & ICF = conditioned MEP amplitude / | No significant difference in RMT between patients, people at ultra-high risk of psychosis (UHR) and HCs was found. MEP was smaller in patients than HCs. Patients showed a reduced | A negative correlation was found between PANSS positive score and 1 mV-MEP size and CSP duration. Also, PANSS                                                                   |                                                                                                                                                                                      |

|                           |                 |                                                       |                                                                                                                                |     |       |                                                                                       |     |                                                                                                                                                                                                                                                                                                                                                           |  |                                                                                                                                                                                                                                      |                                                                                                                                                                                                                                                                                                                                                                                                                                                                          |                                                                                                                                                                                                                                                                                                                                                                                                                               |
|---------------------------|-----------------|-------------------------------------------------------|--------------------------------------------------------------------------------------------------------------------------------|-----|-------|---------------------------------------------------------------------------------------|-----|-----------------------------------------------------------------------------------------------------------------------------------------------------------------------------------------------------------------------------------------------------------------------------------------------------------------------------------------------------------|--|--------------------------------------------------------------------------------------------------------------------------------------------------------------------------------------------------------------------------------------|--------------------------------------------------------------------------------------------------------------------------------------------------------------------------------------------------------------------------------------------------------------------------------------------------------------------------------------------------------------------------------------------------------------------------------------------------------------------------|-------------------------------------------------------------------------------------------------------------------------------------------------------------------------------------------------------------------------------------------------------------------------------------------------------------------------------------------------------------------------------------------------------------------------------|
|                           |                 |                                                       |                                                                                                                                |     |       |                                                                                       |     | 10 trials.<br>SICI & ICF:<br>CS = 80%<br>RMT, TS<br>was set to<br>produce an<br>average<br>MEP of 1<br>mV in 5/10<br>trials, ISI =<br>3 (SICI) and<br>10 (ICF)<br>ms, 10 trials<br>each                                                                                                                                                                   |  | unconditioned<br>MEP amplitude                                                                                                                                                                                                       | SICI than HCs,<br>whereas no<br>significant<br>difference in ICF<br>was found among<br>groups. CSP<br>duration was longer<br>in patients and UHR<br>than in HCs, but no<br>difference between<br>patients and UHR<br>was found.                                                                                                                                                                                                                                          | negative was<br>sig correlated<br>with 1mV<br>MEP (positive<br>correlation)<br>and ICF<br>(negative<br>correlation)                                                                                                                                                                                                                                                                                                           |
| Daskalakis et al. (2008a) | cross-sectional | 6<br>unmedicated (4 M); 10<br>clozapine treated (7 M) | 32.3 ± 9.8<br>(unmedicated);<br>30.2 ± 6.5<br>(clozapine-treated),<br>mean<br>duration of<br>treatment<br>was 2.5 ±<br>2.4 yrs | N/A | PANSS | 6 patients were<br>unmedicated for 1<br>month or more,<br>10 were taking<br>clozapine | N/A | CSP: left M1<br>sustained<br>moderate<br>contraction<br>of the right<br>APB,<br>intensity =<br>110% and<br>140% RMT,<br>10 trials at<br>each<br>intensity.<br>SICI & ICF:<br>CS = 80%<br>RMT, TS<br>was<br>adjusted to<br>produce an<br>average<br>MEP of<br>0.5–1.5 mV<br>peak-to-<br>peak<br>amplitude<br>in the<br>contralateral<br>APB, ISI =<br>2, 4 |  | RMT; absolute<br>CSP duration =<br>time from the<br>MEP onset to the<br>return of any<br>voluntary EMG<br>activity; SICI &<br>ICF = mean<br>conditioned MEP<br>amplitude (peak-<br>to-peak) / mean<br>unconditioned<br>MEP amplitude | No significant<br>difference in RMT<br>between<br>unmedicated and<br>clozapine-treated<br>patients and HCs<br>was found. In all 3<br>groups stimulation<br>at 140% RMT<br>produced longer<br>CSP duration than<br>110% RMT; for<br>each intensity,<br>clozapine treated<br>patients had<br>significantly longer<br>CSP than<br>unmedicated<br>patients and HCs.<br>No significant<br>difference among<br>groups was found in<br>unconditioned MEP<br>size, SICI and ICF. | In all patients,<br>a significant<br>positive<br>correlation<br>was found<br>between<br>PANSS<br>positive scores<br>and SICI<br>(averaged<br>across ISIs of<br>2 and 4 ms),<br>whereas no<br>significant<br>correlations<br>were found<br>between this<br>parameter and<br>PANSS<br>negative or<br>global scores.<br>Also, ICF<br>(averaged<br>across ISIs of<br>10, 15, 20 ms)<br>was positively<br>correlated with<br>PANSS |

|                         |                 |          |            |                                                          |       |                                                                                                                                                 |     |                                                                                                                                                                                                   |                                                 |                                                                                                                                                                                                                                                                                                                                                                                                                                                                                    |                                                                                                                                                                                                                                                                                                                                                                                                                                                                                                               |
|-------------------------|-----------------|----------|------------|----------------------------------------------------------|-------|-------------------------------------------------------------------------------------------------------------------------------------------------|-----|---------------------------------------------------------------------------------------------------------------------------------------------------------------------------------------------------|-------------------------------------------------|------------------------------------------------------------------------------------------------------------------------------------------------------------------------------------------------------------------------------------------------------------------------------------------------------------------------------------------------------------------------------------------------------------------------------------------------------------------------------------|---------------------------------------------------------------------------------------------------------------------------------------------------------------------------------------------------------------------------------------------------------------------------------------------------------------------------------------------------------------------------------------------------------------------------------------------------------------------------------------------------------------|
| Takahashi et al. (2013) | cross-sectional | 20 (9 M) | 27.4 ± 6.5 | 19.8 ± 12.5 months (duration of illness less than 3 yrs) | PANSS | unmedicated patients (n=3); 2nd generation antipsychotics (n=8); 2nd generation antipsychotics and benzodiazepines (n=7); benzodiazepines (n=2) | N/A | (inhibitory), 10, 15 and 20 (facilitatory) ms<br>SICI & ICF: left M1<br>CS = 80%<br>RMT, TS = 130% RMT, ISI = 2, 3 (SICI), 10, 15 (ICF) ms, ITI = 10s, 10 trials each for TS alone and the 4 ISIs | RMT; SICI & ICF = mean / mean unconditioned MEP | No significant difference in RMT between patients and HCs. SICI & ICF: there was a significant effect of ISI (all 4 ISIs entered into an ANOVA) on MEP ratio (conditioned MEP/unconditioned MEP) in both groups, but no significant difference in MEP ratio between ISIs of 2 and 3 ms, and no difference in MEP ratio between ISIs of 10 and 15 ms; patients had significantly less SICI (i.e. higher MEP ratio) than HCs; no significant difference found in ICF between groups. | positive score, but not with other symptoms dimensions. Daily dose of antipsychotics and benzodiazepines did not correlate with any of the PANSS scores. In patients, SICI showed a significant negative correlation with the digit sequencing task (working memory) score, i.e. higher the task score, the more inhibition; SICI was not correlated with age, illness duration, daily dose of antipsychotics or benzodiazepines, or any PANSS scores. The TMS outcomes did not correlate with cognitive test |
|-------------------------|-----------------|----------|------------|----------------------------------------------------------|-------|-------------------------------------------------------------------------------------------------------------------------------------------------|-----|---------------------------------------------------------------------------------------------------------------------------------------------------------------------------------------------------|-------------------------------------------------|------------------------------------------------------------------------------------------------------------------------------------------------------------------------------------------------------------------------------------------------------------------------------------------------------------------------------------------------------------------------------------------------------------------------------------------------------------------------------------|---------------------------------------------------------------------------------------------------------------------------------------------------------------------------------------------------------------------------------------------------------------------------------------------------------------------------------------------------------------------------------------------------------------------------------------------------------------------------------------------------------------|

|                           |                 |                                          |                                                       |     |                                                                                                                                            |                                                                                              |                                                                                                                                                                                                                                                         |                                                                                                                                                                                                                                          |         |                                                               |                                                                                                                                                                                                                                                     |                                                                                                                                                                                                                                             |
|---------------------------|-----------------|------------------------------------------|-------------------------------------------------------|-----|--------------------------------------------------------------------------------------------------------------------------------------------|----------------------------------------------------------------------------------------------|---------------------------------------------------------------------------------------------------------------------------------------------------------------------------------------------------------------------------------------------------------|------------------------------------------------------------------------------------------------------------------------------------------------------------------------------------------------------------------------------------------|---------|---------------------------------------------------------------|-----------------------------------------------------------------------------------------------------------------------------------------------------------------------------------------------------------------------------------------------------|---------------------------------------------------------------------------------------------------------------------------------------------------------------------------------------------------------------------------------------------|
|                           |                 |                                          |                                                       |     |                                                                                                                                            |                                                                                              |                                                                                                                                                                                                                                                         |                                                                                                                                                                                                                                          |         |                                                               |                                                                                                                                                                                                                                                     | performance on list learning (verbal memory), token motor task (motor speed), category fluency and letter fluency (verbal fluency), symbol coding (attention and speed of information processing), and Tower of London (executive function) |
| Daskalakis et al. (2008b) | cross-sectional | 14 medicated (10 M); 6 unmedicated (4 M) | 32.57 ± 11.71 (medicated); 32.67 ± 9.67 (unmedicated) | N/A | PANSS; Motor abnormalities assessed by Abnormal Involuntary Movement Scale (AIMS), Simpson-Angus Scale (SAS), Barnes Akathisia Scale (BAS) | 6 patients were antipsychotics free for 1 month or longer, 14 were on a single antipsychotic | Use-dependent plasticity paradigm to assess time-limited reorganization of motor circuits: (1) measure the spontaneous direction of TMS-induced thumb movements; (2) train participants to produce brisk thumb movements opposite (180 degrees) to this | stimulation intensity = the lowest intensity necessary to produce consistent thumb movements in 1 axis (i.e. abduction/adduction or flexion/extension), stimuli were delivered at a frequency of 0.1 Hz for 10 minutes (i.e. 60 stimuli) | left M1 | RMT; direction and acceleration of TMS-induced thumb movement | No significant difference in RMT among medicated and unmedicated patients and HCs. No significant difference across the 3 groups in TMS-induced acceleration (the "briskness") at baseline. Significant difference between unmedicated patients and | No association between training direction or accelerations and post-training orientation across all participants                                                                                                                            |

baseline direction for 30 minutes at frequency of 1 Hz; and (3) measure the direction of TMS-induced thumb movement after training during the course of 30 min

HCs and between medicated patients and HCs was found in post-training thumb direction (measured by angular displacement), but not between medicated and unmedicated patients. Post-training acceleration: no significant difference among groups on TMS-induced movement amplitudes was found following training

|                          |                 |                                                                                                                             |                                              |                                            |                                                                                                                                                                                                |                                                                                                                               |                                                                                                                                                                                                                                                  |                                     |                                                                                                                                                                                                    |                                                                                                                                                                                                           |                                                                                                                                                                                                                                                             |
|--------------------------|-----------------|-----------------------------------------------------------------------------------------------------------------------------|----------------------------------------------|--------------------------------------------|------------------------------------------------------------------------------------------------------------------------------------------------------------------------------------------------|-------------------------------------------------------------------------------------------------------------------------------|--------------------------------------------------------------------------------------------------------------------------------------------------------------------------------------------------------------------------------------------------|-------------------------------------|----------------------------------------------------------------------------------------------------------------------------------------------------------------------------------------------------|-----------------------------------------------------------------------------------------------------------------------------------------------------------------------------------------------------------|-------------------------------------------------------------------------------------------------------------------------------------------------------------------------------------------------------------------------------------------------------------|
| Daskalakis et al. (2002) | cross-sectional | 15 unmedicated (14 med-naïve, 1 med-free for longer than 1 year, 8 M), 13 assessed in the TCI paradigm; 15 medicated (10 M) | unmedicated 33.1 ± 9.3; medicated 32.4 ± 9.0 | unmedicated 8.5 ± 7.2; medicated 3.9 ± 5.8 | PANSS; motor abnormalities assessed by Abnormal Involuntary Movement Scale (AIMS), Simpson-Angus Scale (SAS), and Barnes Akathesia Scale (BAS). No evidence of motor abnormalities in patients | medicated patients: olanzapine (n=11), risperidone (n=1), quetiapine + loxapine (n=1), methotrimeprazine + perphenazine (n=1) | CSP: sustained moderate contraction of right FDI, intensity = 10%, 20%, 30%, and 40% above AMT, 15 trials for each intensity. SICI & ICF: CS = 80% RMT, TS was adjusted to produce an average MEP of 0.5 to 1.5 mV peak-to-peak amplitude in the | left M1, TCI it's left and right M1 | RMT; CSP duration (time from the MEP onset to the return of any voluntary EMG activity) and MEP size; SICI & ICF = mean conditioned MEP size / mean unconditioned MEP size; TCI = mean conditioned | Unmedicated patients showed significantly lower RMT than medicated patients and HCs, but no difference between medicated patients and HCs. SICI: significant difference between unmedicated and HCs; when | In all 30 patients, SICI (averaged across ISI = 2 and 4 ms) was correlated with PANSS total (Pearson r = 0.50, spearman rank $\rho$ = 0.53), positive (r = 0.46, $\rho$ = 0.53) and global (r = 0.53, $\rho$ = 0.56) scores but not with PANSS negative. No |
|--------------------------|-----------------|-----------------------------------------------------------------------------------------------------------------------------|----------------------------------------------|--------------------------------------------|------------------------------------------------------------------------------------------------------------------------------------------------------------------------------------------------|-------------------------------------------------------------------------------------------------------------------------------|--------------------------------------------------------------------------------------------------------------------------------------------------------------------------------------------------------------------------------------------------|-------------------------------------|----------------------------------------------------------------------------------------------------------------------------------------------------------------------------------------------------|-----------------------------------------------------------------------------------------------------------------------------------------------------------------------------------------------------------|-------------------------------------------------------------------------------------------------------------------------------------------------------------------------------------------------------------------------------------------------------------|

|                                                                                                                                                                                                                                                                                                                                                                                                                                       |                                                         |                                                                                                                                                                                                                                                                                                                                                                                                                                                                                                                                                    |                                                                |
|---------------------------------------------------------------------------------------------------------------------------------------------------------------------------------------------------------------------------------------------------------------------------------------------------------------------------------------------------------------------------------------------------------------------------------------|---------------------------------------------------------|----------------------------------------------------------------------------------------------------------------------------------------------------------------------------------------------------------------------------------------------------------------------------------------------------------------------------------------------------------------------------------------------------------------------------------------------------------------------------------------------------------------------------------------------------|----------------------------------------------------------------|
| <p>contralateral FDI, ISI = 2, 4, 10, 15, and 20 ms, 12 trials for each condition (TS alone and 5 CS-TS pairs), ITI = 5 sec. Dual-pulse transcallosal inhibition: suprathreshold CS to the right M1, suprathreshold TS to the left M1, both set to produce MEPs of 0.5 to 1.5 mV peak-to-peak amplitude in the contralateral FDI, ISI = 2, 6, 10, 15, and 20 ms, ITI = 5 sec, 12 trials for each condition (TS alone and 5 CS-TS)</p> | <p>MEP amplitude / mean unconditioned MEP amplitude</p> | <p>averaged across both inhibitory ISIs (2 and 4 ms) unmedicated patients showed 31.2% less inhibition than HCs, and medicated patients showed 15.64% less inhibition than HCs. ICF: no group differences. CSP duration: significant differences between unmedicated and HCs (at 40% above the AMT) and between medicated and unmedicated (at 30% and 40% above the AMT) but not between medicated and HCs; when averaged across all intensities, unmedicated were 15.26 ms less than HCs who were 5.38 ms less than medicated; no significant</p> | <p>correlation between other TMS measures and PANSS scores</p> |
|---------------------------------------------------------------------------------------------------------------------------------------------------------------------------------------------------------------------------------------------------------------------------------------------------------------------------------------------------------------------------------------------------------------------------------------|---------------------------------------------------------|----------------------------------------------------------------------------------------------------------------------------------------------------------------------------------------------------------------------------------------------------------------------------------------------------------------------------------------------------------------------------------------------------------------------------------------------------------------------------------------------------------------------------------------------------|----------------------------------------------------------------|

|                        |                 |          |            |     |       |                                                                                  |                                                                                                                           |                                                                                                                                                                                                                                                  |         |                                                                                                                                                                 |                                                                                                                                                                                                                                                                                                                                           |                                                                                                                                                                                                                                          |
|------------------------|-----------------|----------|------------|-----|-------|----------------------------------------------------------------------------------|---------------------------------------------------------------------------------------------------------------------------|--------------------------------------------------------------------------------------------------------------------------------------------------------------------------------------------------------------------------------------------------|---------|-----------------------------------------------------------------------------------------------------------------------------------------------------------------|-------------------------------------------------------------------------------------------------------------------------------------------------------------------------------------------------------------------------------------------------------------------------------------------------------------------------------------------|------------------------------------------------------------------------------------------------------------------------------------------------------------------------------------------------------------------------------------------|
|                        |                 |          |            |     |       |                                                                                  |                                                                                                                           |                                                                                                                                                                                                                                                  |         |                                                                                                                                                                 | group difference in CSP-MEP size. TCI: inhibition begins at ISI = 6 ms, significant difference between unmedicated and HCs but not between unmedicated and medicated or medicated and HCs; when averaged across all ISIs (2~20 ms), unmedicated showed 23.25 % less inhibition than HCs, medicated showed 9.92% less inhibition than HCs. |                                                                                                                                                                                                                                          |
| Bridgman et al. (2016) | cross-sectional | 11 (7 M) | 38.5 ± 9.0 | N/A | PANSS | patients were on a stable dose of antipsychotic medications for at least 1 month | Working memory performance was assessed by verbal N-back task (N = 1 and 3), 30 min after TMS assessments on the same day | Stimulation intensity = the intensity (SI-1mV) that elicits an average MEP amplitude of approximately 1 mV peak-to-peak in the relaxed APB muscle. LICI: CS = TS = SI-1mV, ISI = 100, 150 and 200 ms. SICI & ICF: CS = 80% RMT, TS = SI-1mV, ISI | left M1 | RMT; LICI; SICI & ICF = 1 minus conditioned MEP amplitude / mean unconditioned MEP amplitude); CSP duration = from time of MEP onset to the return of voluntary | Patients had significantly higher RMT than HCs. No difference in LICI was seen between groups; there was more LICI in the 100 ms ISI compared to both the 150 ms and the 200 ms ISIs regardless of diagnosis. There was                                                                                                                   | When patients' and HCs' data were pooled, 3-back task accuracy was associated with more SICI in the 4 ms ISI, but not in the 2 ms ISI. When separated by diagnosis, this trend was "approaching significance" only in the patients, (p = |

= 2, 4 (SICI), 10, 15, 20 (ICF) ms. CSP: intensity = 140% RMT, sustained 20% maximum contraction of APB muscle

EMG activity that is half the size of the background EMG

significantly less SICI in the 2 ms and 4 ms ISI in patients compared to HCs; and there was significantly more SICI in the 2 ms ISI than the 4 ms ISI regardless of diagnosis. No difference between groups in CSP duration or ICF.

0.09) and not in the HCs (p = 0.14). A negative correlation was also found between RMT and 3-back performance across all subjects.

|                          |                                                                                                                                              |                                           |                                                  |                                                 |                                                                                 |                                                                                                                                                                                                                                                                                                                                                                         |     |                                                                                                                                                                                                                                                                                                                                                                                                  |         |                                                                                                                                                                                                                                                                                          |                                                                                                                                                                                                                                                                                                                                        |                                                                                                                                                                                                                                                                                                                         |
|--------------------------|----------------------------------------------------------------------------------------------------------------------------------------------|-------------------------------------------|--------------------------------------------------|-------------------------------------------------|---------------------------------------------------------------------------------|-------------------------------------------------------------------------------------------------------------------------------------------------------------------------------------------------------------------------------------------------------------------------------------------------------------------------------------------------------------------------|-----|--------------------------------------------------------------------------------------------------------------------------------------------------------------------------------------------------------------------------------------------------------------------------------------------------------------------------------------------------------------------------------------------------|---------|------------------------------------------------------------------------------------------------------------------------------------------------------------------------------------------------------------------------------------------------------------------------------------------|----------------------------------------------------------------------------------------------------------------------------------------------------------------------------------------------------------------------------------------------------------------------------------------------------------------------------------------|-------------------------------------------------------------------------------------------------------------------------------------------------------------------------------------------------------------------------------------------------------------------------------------------------------------------------|
| Fitzgerald et al. (2004) | TMS measures of cortical excitability were made before and after a period of rTMS, but SICI and ICF were only recorded before the rTMS train | medicated 16 (10 M); unmedicated 10 (8 M) | 32.2 ± 8.8 (medicated); 32.6 ± 8.3 (unmedicated) | 8.8 ± 10.4 (medicated); 6.4 ± 5.1 (unmedicated) | PANSS; Simpson-Angus rating scale (SA); Global Assessment of Functioning (GAF). | Unmedicated patients had not been treated with any oral antipsychotic for at least 3 months or depot for at least 12 months. Medicated patients were receiving a single antipsychotic for a minimum of 1 month: olanzapine (n=7); risperidone (n=4); quetiapine (n=5). No concurrent treatment with anticonvulsant or lithium, and excluded who were regularly taking a | N/A | AMT: sustained contraction of right APB muscle at 5% of maximum force. MEP size: intensity = 120% RMT, 10 trials. CSP: stimulation intensity = 120% AMT, sustained contraction at 5% of maximum, 10 trials. SICI & ICF: CS = 5% below the AMT, TS was adjusted to produce MEPs of 0.5~1.0 mV, ISI = 2 (SICI) and 15 (ICF) ms, 10 trials for each condition (TS alone and 2 CS-TS pairs), ITI = 5 | left M1 | RMT; AMT; MEP size (measured as the area under the curve); CSP duration (measured from the time of stimulation to the return of spontaneous EMG activity); SICI & ICF = 1 minus (mean conditioned MEP size / mean unconditioned MEP size). Change in RMT, MEP size and CSP duration were | No difference in RMT, AMT, MEP area or ICF between medicated and unmedicated patients and HCs at baseline, whereas both patient groups had a shorter CSP duration than the HCs, and reduced SICI was found in medicated patients than HCs but found no difference between unmedicated and any group. Comparing response to rTMS (post- | Significant positive correlation between change in RMT and baseline CSP duration (i.e. participants with a shorter CSP duration at baseline had less change in RMT following rTMS). No relationship found between the baseline or the change scores of the TMS outcome measures with the psychopathology scales for the |
|--------------------------|----------------------------------------------------------------------------------------------------------------------------------------------|-------------------------------------------|--------------------------------------------------|-------------------------------------------------|---------------------------------------------------------------------------------|-------------------------------------------------------------------------------------------------------------------------------------------------------------------------------------------------------------------------------------------------------------------------------------------------------------------------------------------------------------------------|-----|--------------------------------------------------------------------------------------------------------------------------------------------------------------------------------------------------------------------------------------------------------------------------------------------------------------------------------------------------------------------------------------------------|---------|------------------------------------------------------------------------------------------------------------------------------------------------------------------------------------------------------------------------------------------------------------------------------------------|----------------------------------------------------------------------------------------------------------------------------------------------------------------------------------------------------------------------------------------------------------------------------------------------------------------------------------------|-------------------------------------------------------------------------------------------------------------------------------------------------------------------------------------------------------------------------------------------------------------------------------------------------------------------------|

benzodiazepine, who had taken any long acting benzodiazepines in the previous 3 days or a short acting benzodiazepine within 18 h of testing

sec. rTMS: a single 15-min train, intensity = 110% RMT, frequency 1 Hz

calculated by subtracting the pre-rTMS scores from the post-rTMS scores

minus pre-rTMS) across groups: significant difference was found in change in RMT between HCs and unmedicated and between HCs and medicated (HCs > medicated and unmedicated), no difference between the 2 patient groups. Also there was an increase in AMT level in the control and medication treated group but not the unmedicated patients. No difference in change in MEP size among groups. There was a significant decrease in CSP duration in the HCs and an increase (not significant) in CSP duration in both patient groups. The

patient groups (pooled)

|                      |                                                      |           |            |           |                 |                                                                                                                                                                   |     |                                                                                                                                                                                                                                                                                                                                                                                                                                                                                    |         |                                                                                        |                                                                                                                                                                                                                                                                                                                                                                                                                                                                                                                                                                                                                                |                                                     |                                                                                                                                                                                                                                                                                                                                                                                                                                             |
|----------------------|------------------------------------------------------|-----------|------------|-----------|-----------------|-------------------------------------------------------------------------------------------------------------------------------------------------------------------|-----|------------------------------------------------------------------------------------------------------------------------------------------------------------------------------------------------------------------------------------------------------------------------------------------------------------------------------------------------------------------------------------------------------------------------------------------------------------------------------------|---------|----------------------------------------------------------------------------------------|--------------------------------------------------------------------------------------------------------------------------------------------------------------------------------------------------------------------------------------------------------------------------------------------------------------------------------------------------------------------------------------------------------------------------------------------------------------------------------------------------------------------------------------------------------------------------------------------------------------------------------|-----------------------------------------------------|---------------------------------------------------------------------------------------------------------------------------------------------------------------------------------------------------------------------------------------------------------------------------------------------------------------------------------------------------------------------------------------------------------------------------------------------|
| Strube et al. (2016) | The anodal-tDCS and PAS sessions were 4~8 days apart | 20 (13 M) | 31.5 ± 9.0 | 7.1 ± 5.9 | PANSS; GAF; CGI | medication free (n=1), the others were taking stable ongoing antipsychotics for 1 week before testing (9 on monotherapy, 10 on a combination of 2 antipsychotics) | N/A | The stimulation intensity corresponded to an average MEP amplitude of 1 mV (S1 mV). 40 single stimuli were delivered at baseline; after PAS and tDCS, 20 single stimuli delivered at time-points 0, 5, 10, 20 and 30 min. SICI & ICF were obtained at baseline and 15 mins after the plasticity protocols, CS = 80% RMT, TS = S1 mV (intensities not adjusted after plasticity protocols), ISI = 2, 3 (SICI), 7, 9, 12 (ICF) ms. Anodal-tDCS: intensity = 1 mA, duration = 13 min, | left M1 | RMT; S1 mV; SI-1 mV MEP size; SICI & ICF (absolute MEP values of each condition in mV) | Baseline of A-tDCS session: no significant group differences for RMT, S1 mV, SI-1 mV MEP, and ICF; significantly less SICI (i.e. higher absolute MEP values) in patients than HCs at ISI = 2 and 3 ms and averaged 2 & 3 ms. Baseline of PAS session: reduced SICI in patients at ISI = 2 and 3 ms and averaged 2 & 3 ms, and reduced ICF in patients at ISI = 9 ms and mean 9~12 ms value. LTP induction via tDCS (pre- vs post-tDCS): In HCs, significant increase in MEP size at 0 and 20 min and on average over all time points; In patients, all time points showed significant MEP size increase. LTP induction via PAS | results did not change after excluding left-handed. | The averaged MEP size of all time points following tDCS was correlated positively with PANSS positive, negatively with PANSS general psychopathology, total, and CGI scores, and positively with GAF, but these correlations would not survive corrections for multiple comparisons and thus have to be interpreted with caution. SCZ smokers showed a significant negative correlation between Fagerstrom values (for nicotine dependence) |
|----------------------|------------------------------------------------------|-----------|------------|-----------|-----------------|-------------------------------------------------------------------------------------------------------------------------------------------------------------------|-----|------------------------------------------------------------------------------------------------------------------------------------------------------------------------------------------------------------------------------------------------------------------------------------------------------------------------------------------------------------------------------------------------------------------------------------------------------------------------------------|---------|----------------------------------------------------------------------------------------|--------------------------------------------------------------------------------------------------------------------------------------------------------------------------------------------------------------------------------------------------------------------------------------------------------------------------------------------------------------------------------------------------------------------------------------------------------------------------------------------------------------------------------------------------------------------------------------------------------------------------------|-----------------------------------------------------|---------------------------------------------------------------------------------------------------------------------------------------------------------------------------------------------------------------------------------------------------------------------------------------------------------------------------------------------------------------------------------------------------------------------------------------------|

|                          |                 |                                      |                                                       |                                                        |                                                                                |                                                                                                                                                                              |     |                                                                                                                                                                                                                                                                                                                                                                                                            |         |                                                                                          |                                                                                                                                                                                                                                                                                                                                                                                                                   |                                                                                    |
|--------------------------|-----------------|--------------------------------------|-------------------------------------------------------|--------------------------------------------------------|--------------------------------------------------------------------------------|------------------------------------------------------------------------------------------------------------------------------------------------------------------------------|-----|------------------------------------------------------------------------------------------------------------------------------------------------------------------------------------------------------------------------------------------------------------------------------------------------------------------------------------------------------------------------------------------------------------|---------|------------------------------------------------------------------------------------------|-------------------------------------------------------------------------------------------------------------------------------------------------------------------------------------------------------------------------------------------------------------------------------------------------------------------------------------------------------------------------------------------------------------------|------------------------------------------------------------------------------------|
|                          |                 |                                      |                                                       |                                                        |                                                                                |                                                                                                                                                                              |     | anodal electrode positioned on the left M1 (area for the right FDI muscle), cathodal electrode placed above the ipsilateral right orbit. PAS: 180 pairs of peripheral nerve (ulnar nerve) stimuli (PNS) followed by TMS stimuli with an ISI of 25 ms, PNS intensity = 300% of the individual perceptual threshold, resulting in an average electrical intensity of $8.3 \pm 2.1$ mA, TMS intensity = S1 mV |         |                                                                                          | (pre- vs post-PAS): In HCs, significant MEP increase for all post-PAS time points compared to baseline and for the average of all time points; In patients, no increase in MEP size. SICI & ICF after tDCS: significant increase in absolute MEP size for TS alone, 3 ms SICI, and 7, 9 & 12 ms ICF in patients. SICI & ICF after PAS: significant increase in MEP size for TS alone, and 7 and 12 ms ICF in HCs. | and mean post-tDCS MEP size                                                        |
| Fitzgerald et al. (2003) | cross-sectional | 9 medicated (6M); 9 unmedicated (6M) | medicated $27.7 \pm 5.1$ ; unmedicated $33.8 \pm 8.2$ | medicated $4.11 \pm 3.05$ ; unmedicated $6.0 \pm 4.81$ | PANSS; Montgomery-Åsberg Depression Rating Scale (MADRS); Simpson-Angus rating | 9 patients had not been treated with any oral medication for at least 3 months or depot for at least 12 months; 9 were taking a single antipsychotic medication for at least | N/A | LICI: CS = TS = the intensity that produced an average MEP of 0.5~1.0 mV (about 20% above RMT),                                                                                                                                                                                                                                                                                                            | left M1 | RMT; LICI = mean conditioned MEP size / mean unconditioned MEP size; I-wave facilitation | No difference in RMT among medicated and unmedicated patients and HCs. A significant degree of LICI was seen in all                                                                                                                                                                                                                                                                                               | No significant correlation between I-wave facilitation and LICI, or between I-wave |

|                    |                                                                                                    |           |              |              |                                                                                            |                                                                                                                                                                                                                             |     |                                                                                                                                                                                                                                                  |                                                 |                                                                                                                                                                                                                                                                                                                                                         |                                                                                                                                                                                                                                                                                    |  |
|--------------------|----------------------------------------------------------------------------------------------------|-----------|--------------|--------------|--------------------------------------------------------------------------------------------|-----------------------------------------------------------------------------------------------------------------------------------------------------------------------------------------------------------------------------|-----|--------------------------------------------------------------------------------------------------------------------------------------------------------------------------------------------------------------------------------------------------|-------------------------------------------------|---------------------------------------------------------------------------------------------------------------------------------------------------------------------------------------------------------------------------------------------------------------------------------------------------------------------------------------------------------|------------------------------------------------------------------------------------------------------------------------------------------------------------------------------------------------------------------------------------------------------------------------------------|--|
|                    |                                                                                                    |           |              |              | (parkinsonism); GAF. Symptom severity rating was done within 48 h of the testing procedure | 1 month (4 on olanzapine, 2 risperidone, 2 quetiapine). Participants were not taking anticonvulsants or lithium, or long-acting benzodiazepines, and short-acting benzodiazepines were not permitted within 18 h of testing |     | ITI = 5 sec. I-wave facilitation: CS intensity was set to produce an average MEP of 1 mV, TS = 90% RMT, ISI = 1.2 (to assess I-wave facilitation during the 1st I-wave peak) and 2 (facilitation does not usually occur, a control condition) ms | = conditioned MEP size / unconditioned MEP size | groups, but no significant difference among the groups. Significant I-wave facilitation was seen in all groups and the degree of facilitation was greatest in the medicated group and least in the HCs, there was a significant difference between the HCs and medicated group; at ISI = 2 ms, no facilitation was seen and no difference among groups. | facilitation and psychopathology and parkinsonism scores (data pooled for the patient groups)                                                                                                                                                                                      |  |
| Du and Hong (2018) | The inter-session interval for patients was 24.60 ± 19.25 days, and for HCs was 29.41 ± 23.88 days | 25 (18 M) | 36.86 ± 13.6 | 16.40 ± 15.2 | BPRS                                                                                       | medication free (n=5), typical antipsychotics (n=1), atypical antipsychotics (n=18), both types (n=1), antidepressants (n=1). No change in medication or dose between the 2 testing sessions                                | N/A | SICI & ICF: CS = 80% RMT, TS = 120% RMT, ISI = 1, 3 (SICI), 6, 9, 12, 15, 18, 21, 30, 40, 80, 120, 200 and 500 (ICF) ms, ITI = 4~10 sec                                                                                                          | left M1                                         | RMT; SICI & ICF (ratio) = mean conditioned MEP / mean unconditioned MEP                                                                                                                                                                                                                                                                                 | No significant difference in RMT between sessions or groups. MEP amplitudes evoked by 120% RMT did not show significant difference between sessions in HCs and patients, suggesting a stable and comparable cortical excitability at M1 between sessions and groups. Significantly |  |

|                      |                 |                                                   |                                                   |                                                             |       |                                                                                                                                                                                                                                |                                                                                          |                                                                                                                                                                                                                                                                      |         |                                                                                                                                                                                                                                          |                                                                                                                                                                                                                                                                                                                                                                                                         |                                                                                                                                                                                                                                                                                                                   |
|----------------------|-----------------|---------------------------------------------------|---------------------------------------------------|-------------------------------------------------------------|-------|--------------------------------------------------------------------------------------------------------------------------------------------------------------------------------------------------------------------------------|------------------------------------------------------------------------------------------|----------------------------------------------------------------------------------------------------------------------------------------------------------------------------------------------------------------------------------------------------------------------|---------|------------------------------------------------------------------------------------------------------------------------------------------------------------------------------------------------------------------------------------------|---------------------------------------------------------------------------------------------------------------------------------------------------------------------------------------------------------------------------------------------------------------------------------------------------------------------------------------------------------------------------------------------------------|-------------------------------------------------------------------------------------------------------------------------------------------------------------------------------------------------------------------------------------------------------------------------------------------------------------------|
|                      |                 |                                                   |                                                   |                                                             |       |                                                                                                                                                                                                                                |                                                                                          |                                                                                                                                                                                                                                                                      |         | reduced SICI in patients at ISI = 1 and 3 ms (ratio merged from the 2 sessions). Patients and HCs did not differ in ICF at ISIs of 9, 12 and 15 ms (the 2 sessions are merged), and none of the other ISIs showed sig group differences. |                                                                                                                                                                                                                                                                                                                                                                                                         |                                                                                                                                                                                                                                                                                                                   |
| Mehta et al. (2014a) | cross-sectional | 33 antipsychotic-naïve (18 M); 21 medicated (9 M) | 33.60 ± 9.74 (med-naïve); 9.19 ± 6.60 (medicated) | 41.12 ± 44.20 (med-naïve); 50.42 ± 42.65 (medicated) months | PANSS | Patients in the medicated group were taking atypical antipsychotics (12 risperidone, 4 olanzapine, 3 risperidone + olanzapine, 1 olanzapine + amisulpride, and 1 aripiprazole) with median duration of treatment being 60 days | Participants viewed a static picture of a hand and lock while receiving TMS measurements | MEPs obtained with (a) stimulus intensity equal to 120% of RMT and (b) SI-1 mV. SICI: CS (80% of RMT) was given 3 ms before a TS (SI-1 mV) with the right hand at rest. LICI: A supra-threshold CS (SI-1 mV) was given 100 ms before a supra-threshold TS (SI-1 mV). | left M1 | MEPs amplitude; RMT; SICI & LICI (conditioned MEP / non-conditioned MEP) × 100                                                                                                                                                           | Baseline cortical excitability during the rest state (i.e. viewing a static picture): No significant difference in RMT, SI-1 mV, LICI, MEPs amplitude with 120% RMT or SI-1 mV among the medication-naïve patients, medicated patients and HCs. Antipsychotic-naïve patients had significantly less SICI compared to HCs, but no significant difference in SICI between the medicated patients and HCs. | Theory of mind (ToM) and social perception were assessed using the Social Cognition Rating Tools in Indian Setting (SOCRATIS). Emotion processing was assessed using the Tool for Recognition of Emotions in Neuropsychiatric Disorders (TRENDS). Each test provided an index of the respective test performance, |

which was equivalent to the score of an individual on the test divided by the maximum score possible. An average of z-scores of the 3 individual tests formed the SC composite score. SICI was inversely correlated with SC composite score in drug-naive patients. Among the individual SC dimensions, emotion recognition index had the strongest inverse correlation with SICI. Linear regression showed that group status (medicated vs drug-naive) significantly predicted SC composite score, and

|                     |                                                                                                                                                                                                                                 |                                                     |                                            |                                                                                                                                                                                                                                                   |                                                                                                                                                                                      |                                                                                                                                                                                                                                                                              |     |                                                                                                                                                                                                                                                                                                                                                                                                                                                                |         |                                                                                                                                             |                                                                                                                                                                                                                                                                                                                                                                                                                                                                                                                                                                                      |                                                                                                                                                                                                                                                                     |
|---------------------|---------------------------------------------------------------------------------------------------------------------------------------------------------------------------------------------------------------------------------|-----------------------------------------------------|--------------------------------------------|---------------------------------------------------------------------------------------------------------------------------------------------------------------------------------------------------------------------------------------------------|--------------------------------------------------------------------------------------------------------------------------------------------------------------------------------------|------------------------------------------------------------------------------------------------------------------------------------------------------------------------------------------------------------------------------------------------------------------------------|-----|----------------------------------------------------------------------------------------------------------------------------------------------------------------------------------------------------------------------------------------------------------------------------------------------------------------------------------------------------------------------------------------------------------------------------------------------------------------|---------|---------------------------------------------------------------------------------------------------------------------------------------------|--------------------------------------------------------------------------------------------------------------------------------------------------------------------------------------------------------------------------------------------------------------------------------------------------------------------------------------------------------------------------------------------------------------------------------------------------------------------------------------------------------------------------------------------------------------------------------------|---------------------------------------------------------------------------------------------------------------------------------------------------------------------------------------------------------------------------------------------------------------------|
| Hasan et al. (2011) | cross-sectional; TMS measurements were performed in the same order within an experimental session before and after a 13 min train of tDCS. All post-tDCS measurements were conducted within 30 min after the tDCS-intervention. | 9 with recent-onset SCZ; 13 with multi-episode SCZ. | 29.33 ± 7.8 (RO-SCZ); 36.00 ± 8.0 (ME-SCZ) | RO-SCZ had a single psychotic episode (lasting at least for one month), no relapse and a duration of psychosis less than 2 years. ME-SCZ had more than two psychotic episodes, at least one relapse and a duration of psychosis more than 2 years | PANSS; GAF; CGI. ME-SCZ showed a higher disease severity, reduced social functioning (GAF) and increased psychopathology as indicated by a higher PANSS total score compared RO-SCZ. | 20 patients were treated with antipsychotics (14 in monotherapy, 6 with risperidone and 6 with quetiapine). In the RO-SCZ group, 1 patient received citalopram and 1 diazepam. In the ME-SCZ group, 1 received mirtazapine, 1 biperiden/ diazepam and 1 biperiden/Lorazepam. | N/A | MEPs were recorded before tDCS and 5 min after the stimulation. SICI and ICF: CS = 80% RMT, TS intensity = SI-1 mV, ISI = 3 (SICI) and 12 (ICF) ms. CSP duration: stimulus intensity = SI-1 mV (25~30% of maximal contraction). For SICI, ICF, and CSP measures, RMT and SI-1 mV were adjusted after tDCS. Anodal tDCS: The anodal electrode was placed over the representation al field of the right FDI as identified by TMS, and the cathodal electrode was | left M1 | RMT; MEPs amplitude evoked by SI-1 mV; SICI & ICF = (mean amplitude of conditioned MEP / mean amplitude of unconditioned MEP); CSP duration | At baseline, patients presented significantly elevated RMT and reduced SICI compared to HCs (differences did not occur in the 3-group comparison). No difference in ICF, CSP duration or SI-1 mV MEP size among RO-SCZ, ME-SCZ and HCs at baseline. After tDCS, there was significant facilitation of 1 mV-MEP within all groups; HCs showed higher 1 mV-MEPs compared to ME-SCZ, but not compared to RO-SCZ; RO-SCZ showed a trendwise higher 1 mV-MEPs compared to ME-SCZ (p = 0.084). No change in SICI within patients (n=22) and HCs (pre- vs post-tDCS) and patients still had | SICI was not a significant predictor. No correlation was found between the main outcome parameters and antipsychotic dose, PANSS, CGI, GAF, number of psychotic episodes and duration of psychosis across the patients groups and for each patient group separately |
|---------------------|---------------------------------------------------------------------------------------------------------------------------------------------------------------------------------------------------------------------------------|-----------------------------------------------------|--------------------------------------------|---------------------------------------------------------------------------------------------------------------------------------------------------------------------------------------------------------------------------------------------------|--------------------------------------------------------------------------------------------------------------------------------------------------------------------------------------|------------------------------------------------------------------------------------------------------------------------------------------------------------------------------------------------------------------------------------------------------------------------------|-----|----------------------------------------------------------------------------------------------------------------------------------------------------------------------------------------------------------------------------------------------------------------------------------------------------------------------------------------------------------------------------------------------------------------------------------------------------------------|---------|---------------------------------------------------------------------------------------------------------------------------------------------|--------------------------------------------------------------------------------------------------------------------------------------------------------------------------------------------------------------------------------------------------------------------------------------------------------------------------------------------------------------------------------------------------------------------------------------------------------------------------------------------------------------------------------------------------------------------------------------|---------------------------------------------------------------------------------------------------------------------------------------------------------------------------------------------------------------------------------------------------------------------|

|                    |                 |                                                            |                                       |                                       |                            |                                                                                                                                                                                                                                                                                              |     |                                                                                                                                                                                                                     |                                                          |               |                                                                                                                                                                                                                                                                                                                                                             |                                                                                                                                                                                                                                        |
|--------------------|-----------------|------------------------------------------------------------|---------------------------------------|---------------------------------------|----------------------------|----------------------------------------------------------------------------------------------------------------------------------------------------------------------------------------------------------------------------------------------------------------------------------------------|-----|---------------------------------------------------------------------------------------------------------------------------------------------------------------------------------------------------------------------|----------------------------------------------------------|---------------|-------------------------------------------------------------------------------------------------------------------------------------------------------------------------------------------------------------------------------------------------------------------------------------------------------------------------------------------------------------|----------------------------------------------------------------------------------------------------------------------------------------------------------------------------------------------------------------------------------------|
|                    |                 |                                                            |                                       |                                       |                            |                                                                                                                                                                                                                                                                                              |     | located contralaterally above the right orbit, a continuous current flow of 13 min with an intensity of 1 mA was used to induce changes in motor cortical excitability                                              |                                                          |               | reduced SICI than HCs; compared to baseline, only RO-SCZ showed an enhanced SICI, and RO-SCZ had an enhanced SICI (more inhibition) compared to ME-SCZ after tDCS, but no difference between RO-SZ and HCs post-tDCS. All 3 groups showed change in CSP duration post-tDCS (didn't specify in which direction). No change in ICF post-tDCS in all 3 groups. |                                                                                                                                                                                                                                        |
| Koch et al. (2008) | cross-sectional | 14 medicated patients (11 M); 6 unmedicated patients (5 M) | 35.71 (medicated); 34.3 (unmedicated) | 14.28 (medicated); 9.16 (unmedicated) | PANSS; GAF; SAS; BAS; AIMS | Medicated patients were taking typical or atypical antipsychotics (aripiprazole, n=3; clozapine, n=3; amisulpride, n=2; olanzapine, n=1; chlorpromazine, n=1; risperidone, n=4). 13 patients were taking benzodiazepines (lorazepam, n=6; alprazolam, n=2; lormetazepam, n=4; diazepam, n=1) | N/A | Cortico-cortical connectivity between the posterior parietal cortex (PPC) and the M1 was tested with a twin-coil procedure. CS was applied at different intensities over the right PPC before MEPs were obtained by | For right PPC, the coil was positioned over P4; right M1 | MEP amplitude | No significant difference in RMT or SI-1 mV MEP among the medicated patients, unmedicated patients and HCs.<br><br>The strength of parieto-motor connectivity differed between SCZ patients and the HCs, both medicated and unmedicated patients in                                                                                                         | In patients (n=20), the mean amount of facilitation across ISIs induced by the CS at 90% RMT correlated with GAF score ( $r = .46$ ; $p < .05$ ) and the PANSS negative score ( $r = -.48$ ; $p < .05$ ), showing that patients with a |

|                    |                                                                                                    |                                                           |                                        |     |     |                                                                                        |     |                                                                                                                                                                                                                       |         |                                                                                                                                                                                                                                                                                                                                                                                                                         |                                                                                                                                                                                                                                                                                                                                                           |
|--------------------|----------------------------------------------------------------------------------------------------|-----------------------------------------------------------|----------------------------------------|-----|-----|----------------------------------------------------------------------------------------|-----|-----------------------------------------------------------------------------------------------------------------------------------------------------------------------------------------------------------------------|---------|-------------------------------------------------------------------------------------------------------------------------------------------------------------------------------------------------------------------------------------------------------------------------------------------------------------------------------------------------------------------------------------------------------------------------|-----------------------------------------------------------------------------------------------------------------------------------------------------------------------------------------------------------------------------------------------------------------------------------------------------------------------------------------------------------|
|                    |                                                                                                    |                                                           |                                        |     |     |                                                                                        |     | right M1 stimulation with participants at rest. CS = 110% or 90% RMT (RMT was tested over the ipsilateral M1); TS intensity = SI-1 mV in the relaxed left FDI. ISIs between CS and TS were 2, 4, 6, 8, 10, and 15 ms. |         | comparison with HCs had less facilitation for CS intensity = 90% RMT at ISI = 2, 4 and 15 ms. In HC, CS applied over the ipsilateral PPC at 90% of RMT intensity was able to increase the excitability (i.e. increased the MEP amplitudes) of the hand area of the right M1, with peaks at ISIs of 4 and 15 msec but failed to induce any facilitatory parieto-motor interaction in medicated and unmedicated patients. | better global functioning and lower negative symptoms had less impaired connectivity. The same parameter positively correlated with illness duration. No other correlations were found. In the medicated group the facilitation across ISIs at 90% RMT did not correlate with the CPZ equivalent dose or with benzodiazepines (i.e. diazepam equivalents) |
| Reid et al. (2002) | cross-sectional; patients and HCs had TMS measurements at rest and after exercising the APB muscle | 11 with SCZ (9 M); 10 with major depressive episode (4 M) | 27.27 ± 6.25 (SCZ); 48.30 ± 12.84 (MD) | N/A | N/A | In SCZ patients, 4 were taking risperidone, 3 olanzapine, 3 clozapine and 1 quetiapine | N/A | TMS was administered at 110% RMT. 16 baseline recordings were produced using trains of 4 with an ISI of 3 sec, and trains were separated by 30 sec.                                                                   | left M1 | MEP; facilitation (calculated in 2 forms: post-minus pre-exercise MEPs; % increase of post-exercise amplitudes over mean baseline amplitudes)                                                                                                                                                                                                                                                                           | No difference in RMT among SCZ, MD and HCs. At baseline, HCs had significantly lower MEP amplitude than the other 2 groups. Facilitation (post-exercise MEP as % of increase compared to                                                                                                                                                                  |

Participants then asked to perform a hand exercise (first, oppose the thumb using a dynamometer as hard as possible to determine the maximal voluntary contraction; at least 10 minutes later the participant was asked to exercise for 30 seconds at 20% of their maximal voluntary contraction using the same dynamometer) followed by 16 post-exercise recordings (4 trains) at the same stimulus parameters

baseline): the 2 patient groups was significantly lower than the HCs but did not differ from each other. Facilitation (post-minus pre-exercise MEPs): the MD group was significantly lower than the HC and SCZ groups.

|                       |                 |           |            |           |                                                                                                                                                                                                                                                                            |                                                                                                                                                                                                                                                                                                                                                                                                                |     |                                                                                                                                                                                                                                                                                                                                                                                                                                                                                                 |              |                                                                                                                                                                                                |                                                                                                                                                                                                                                                                                                                                                                                                                                                                                                                                                                                                                                                   |                                                                                                                                                                                                                                                                                                                              |
|-----------------------|-----------------|-----------|------------|-----------|----------------------------------------------------------------------------------------------------------------------------------------------------------------------------------------------------------------------------------------------------------------------------|----------------------------------------------------------------------------------------------------------------------------------------------------------------------------------------------------------------------------------------------------------------------------------------------------------------------------------------------------------------------------------------------------------------|-----|-------------------------------------------------------------------------------------------------------------------------------------------------------------------------------------------------------------------------------------------------------------------------------------------------------------------------------------------------------------------------------------------------------------------------------------------------------------------------------------------------|--------------|------------------------------------------------------------------------------------------------------------------------------------------------------------------------------------------------|---------------------------------------------------------------------------------------------------------------------------------------------------------------------------------------------------------------------------------------------------------------------------------------------------------------------------------------------------------------------------------------------------------------------------------------------------------------------------------------------------------------------------------------------------------------------------------------------------------------------------------------------------|------------------------------------------------------------------------------------------------------------------------------------------------------------------------------------------------------------------------------------------------------------------------------------------------------------------------------|
| Soubasi et al. (2010) | cross-sectional | 51 (33 M) | 34.4 ± 8.5 | 9.0 ± 7.7 | Acute extrapyramidal symptoms and tardive dyskinesia were initially evaluated at study entry using the Simpson-Angus scale (SAS) and the Abnormal Involuntary Movement scale (AIMS), respectively. Patients who had a score ≥ 1 on any item of either scale were excluded. | Antipsychotics remained unchanged for type and dose for at least 2 months. 39 were treated with a single atypical antipsychotic and 12 with a combination of a typical and an atypical drug (olanzapine, n=20; quetiapine, n=8; ziprasidone, n=11; olanzapine and haloperidol, n=4; quetiapine and haloperidol, n=2; ziprasidone and haloperidol, n=6). None was receiving anticonvulsants or benzodiazepines. | N/A | Stimulus intensity was initially set at 70–80% of maximum output and increased and decreased by 2% steps to ensure supramaximal stimulation. SI-max = the lowest stimulus intensity required to produce maximum MEP. After 3 min, the RMT was estimated. Train of responses to SI-max were then recorded from each muscle (the left and right APB) and the MEP with the highest amplitude, which was most often the one with the shortest latency as well, was selected for analysis. Frequency | bilateral M1 | SI-max; with intensity = SI-max, MEP amplitude and latency (from stimulus artifact to onset of negative peak); RMT; SP1 (silent period obtained by SI-1); SP2 (silent period obtained by SI-2) | Left M1: RMT, SI-max and MEP latency (ms) were significantly higher/longer in patients than HCs; no significant difference in MEP amplitude between groups; and no significant side-to-side difference in SI-max, RMT, MEP latency and amplitude in patients or HCs. SP1 (ms), but not SP2 was significantly longer in patients. Right M1: RMT, SI-max and MEP latency were significantly higher/longer in patients than HCs; no group difference in MEP amplitude. SP1, but not SP2 was significantly longer in patients. However, when SP1 was expressed as a ratio over the corresponding stimulus intensity applied in each participant (i.e. | They explored the relationship between the 2 SPs to the corresponding 2 SIs in each individual: a positive correlation of individual SP2-SP1 difference to the corresponding SI2-SI1 difference, which was significant for HCs but not for patients, was found (data for the right and left hemispheres are pooled together) |
|-----------------------|-----------------|-----------|------------|-----------|----------------------------------------------------------------------------------------------------------------------------------------------------------------------------------------------------------------------------------------------------------------------------|----------------------------------------------------------------------------------------------------------------------------------------------------------------------------------------------------------------------------------------------------------------------------------------------------------------------------------------------------------------------------------------------------------------|-----|-------------------------------------------------------------------------------------------------------------------------------------------------------------------------------------------------------------------------------------------------------------------------------------------------------------------------------------------------------------------------------------------------------------------------------------------------------------------------------------------------|--------------|------------------------------------------------------------------------------------------------------------------------------------------------------------------------------------------------|---------------------------------------------------------------------------------------------------------------------------------------------------------------------------------------------------------------------------------------------------------------------------------------------------------------------------------------------------------------------------------------------------------------------------------------------------------------------------------------------------------------------------------------------------------------------------------------------------------------------------------------------------|------------------------------------------------------------------------------------------------------------------------------------------------------------------------------------------------------------------------------------------------------------------------------------------------------------------------------|

|                                   |                 |                                |             |                                                                                                          |                                                                                                                                         |                                                                                                                                                                                                                                                                                                          |     |                                                                                                                                                                                                                    |              |                                                                                                                                                                                                                                          |                                                                                                                                                                                                                                                                                                                                                                               |                                                                                                                                                                                              |
|-----------------------------------|-----------------|--------------------------------|-------------|----------------------------------------------------------------------------------------------------------|-----------------------------------------------------------------------------------------------------------------------------------------|----------------------------------------------------------------------------------------------------------------------------------------------------------------------------------------------------------------------------------------------------------------------------------------------------------|-----|--------------------------------------------------------------------------------------------------------------------------------------------------------------------------------------------------------------------|--------------|------------------------------------------------------------------------------------------------------------------------------------------------------------------------------------------------------------------------------------------|-------------------------------------------------------------------------------------------------------------------------------------------------------------------------------------------------------------------------------------------------------------------------------------------------------------------------------------------------------------------------------|----------------------------------------------------------------------------------------------------------------------------------------------------------------------------------------------|
|                                   |                 |                                |             |                                                                                                          |                                                                                                                                         |                                                                                                                                                                                                                                                                                                          |     | was 0.2~0.3 Hz. Silent period was determined while the participant exerted isometric contraction at 80% of maximal voluntary contraction; stimulus intensity = 130% of RMT (SI-1) and 90% of maximal output (SI-2) |              |                                                                                                                                                                                                                                          | SP1/SI-1), no group difference was found. Patients on ziprasidone (n=24) demonstrated the highest SI-max for both hemispheres (difference not significant in right cortex), and the highest RMT for the left hemisphere; patients receiving olanzapine (n=17) demonstrated the lowest RMT for the left hemisphere, and those on quetiapine (n=10) showed intermediate values. |                                                                                                                                                                                              |
| Ahlgren-Rimpilainen et al. (2013) | cross-sectional | 11 hospitalised patients (6 M) | 42.6 ± 13.7 | 22.5 ± 12.63 (conventional antipsychotics users, n=6); 11.00 ± 8.94 (atypical antipsychotics users, n=5) | PANSS; AIMS; Barnes Akathisia Scale (BAS); SAS for extrapyramidal symptoms; Calgary depression scale for depression associated with SCZ | 4 patients were on clozapine treatment and 1 was using zotepine (an AA agent like clozapine). 6 used combinations of CA (2 CA users had additionally risperidone, but because they showed clinically significant extrapyramidal signs, they were assessed to belong to the group of CA users). 1 AA user | N/A | Biphasic pulses with an intensity of 60 to 80% of max output were applied, the stimulation intensity constantly exceeded the motor threshold. In each series of stimuli, 5 stimuli were given with an              | bilateral M1 | Latency and duration of CSPs: because multiple CSPs were observed (i.e. a single stimulus elicited more than 1 SP) predominantly in patients, they measured the latency and duration of the first of the multiple CSPs, and to calculate | At the dominant hemisphere: patients and HCs did not differ in latency of CSP in ADM or TA; but patients had a significantly higher number of CSPs in ADM and TA; no significant differences in the first CSP duration or in the total duration of CSP in ADM or TA                                                                                                           | In both hemispheres, TMS measures (latency & duration of the 1st SP, total duration, total number of CSPs) did not correlate with clinical scores, daily dose of antipsychotics, duration of |

had additionally daily lorazepam and 1 CA user and 1 AA user had daily lorazepam.

ISI of 1~5 sec. Responses were recorded using a pair of monopolar needle electrodes that were inserted into the abductor digiti minimi (ADM) muscles in the upper extremities and tibialis anterior (TA) muscles in the lower extremities at a distance of 3 cm from each other. For CSP, muscles were voluntarily maximally preactivated and the following parameters were recorded on the contralateral side: the latency, duration, and total number of silent periods of the activated muscle; the

the total duration of the CSP, durations of the first and later occurring CSPs were added together in respective stimulation site.

between the groups. Nondominant hemisphere: the groups did not differ in latency of CSP in ADM or TA; the patients had a higher number of CSPs in the nondominant ADM (non-significant after Bonferroni correction); no significant differences in the number of CSPs in TA or in the first CSP duration in ADM or TA; total duration of CSP was significantly longer in ADM in patients, but not in TA. No significant side-to-side differences within either group in any of the measures. CA vs AA vs HCs: CA seemed to have the shortest mean first and total CSP duration in the nondominant extremities compared to HCs

illness or age of the patients. In nondominant ADM, a positive correlation was obtained between the number of CSPs and PANSS

|                          |                 |                                                                     |                                                     |                                                                |       |                                                                                                                                                                                                                         |   |                                                                                                                                                                                                                                                                                                                                  |         |                                                                                                                                                                                                                                                                                                                                                           |                                                                                                                                                                                                  |
|--------------------------|-----------------|---------------------------------------------------------------------|-----------------------------------------------------|----------------------------------------------------------------|-------|-------------------------------------------------------------------------------------------------------------------------------------------------------------------------------------------------------------------------|---|----------------------------------------------------------------------------------------------------------------------------------------------------------------------------------------------------------------------------------------------------------------------------------------------------------------------------------|---------|-----------------------------------------------------------------------------------------------------------------------------------------------------------------------------------------------------------------------------------------------------------------------------------------------------------------------------------------------------------|--------------------------------------------------------------------------------------------------------------------------------------------------------------------------------------------------|
|                          |                 |                                                                     |                                                     |                                                                |       |                                                                                                                                                                                                                         |   | presence of the SP was defined as a simultaneous decrease of amplitude of muscular activity below 0.05 mV/div in 5 consecutive measurements.                                                                                                                                                                                     |         |                                                                                                                                                                                                                                                                                                                                                           | and AA; AA seemed to have the longest mean first and total CSP duration in the nondominant extremities, but also in the dominant TA, where also the mean number of CSPs was the highest of all   |
| Basavaraju et al. (2015) | cross-sectional | 18 with ego-boundary disturbance (EBD) (9 M); 32 without EBD (14 M) | 33.11 ± 8.20 (with EBD); 29.97 ± 8.59 (without EBD) | 63.55 ± 56.05 (with EBD); 35.84 ± 34.78 (without EBD) (months) | PANSS | 12 were receiving risperidone, 4 olanzapine, 3 risperidone + olanzapine, 1 amisulpride and 1 aripiprazole. Median duration of treatment was 60 days. The rest were drug-naïve (9 in EBD group, 20 in without EBD group) | 3 | 4 TMS paradigms: single-pulses at 120% RMT, MT1 (the minimum stimulation intensity evoking 1 mV peak-to-peak amplitude in the resting FDI), SICI and LICI. For SICI, CS (80% of RMT) was given 3 ms before a supra-threshold TS (MT1) with the right hand at rest. For LICI, a supra-threshold CS (MT1) is given 100 ms before a | left M1 | RMT; MEPs for 120% RMT and MT1 (mV); SICI & LICI = (conditioned MEP/nonconditioned MEP) × 100. MNA (mirror neuron activity) = % change of motor excitability from resting to action observation states (average of virtual and actual observation) = (motor reactivity at action observation - motor reactivity at rest) × 100 / motor reactivity at rest | Significantly greater MNA in patients without EBD than in patients with EBD for the MT1 and 120% RMT stimulus paradigms, indicating less mirror neuron activity in patients with symptoms of EBD |

|                     |                 |                                                                   |                                                     |     |                                     |                                                                                                                                                                                                                                                                                                      |     |                                                                                                                                                                                                                                                                      |         |                                                          |                                                                                                                                                                                                                                                                                                                                                                                                                                                                                                                                                                                              |                                                                                                                                                                                                                                                                                                                                                                                                                                   |
|---------------------|-----------------|-------------------------------------------------------------------|-----------------------------------------------------|-----|-------------------------------------|------------------------------------------------------------------------------------------------------------------------------------------------------------------------------------------------------------------------------------------------------------------------------------------------------|-----|----------------------------------------------------------------------------------------------------------------------------------------------------------------------------------------------------------------------------------------------------------------------|---------|----------------------------------------------------------|----------------------------------------------------------------------------------------------------------------------------------------------------------------------------------------------------------------------------------------------------------------------------------------------------------------------------------------------------------------------------------------------------------------------------------------------------------------------------------------------------------------------------------------------------------------------------------------------|-----------------------------------------------------------------------------------------------------------------------------------------------------------------------------------------------------------------------------------------------------------------------------------------------------------------------------------------------------------------------------------------------------------------------------------|
| Hasan et al. (2012) | cross-sectional | 18 with first episode SCZ (14 M); 18 at risk of psychosis (14 M); | 25.3 ± 6.3 (1st-episode SCZ); 24.11 ± 5.3 (at risk) | N/A | In SCZ patients, PANSS, GAF and CGI | All at-risk individuals were antipsychotic-naïve, but 7 received an antidepressant and 1 zopiclone. All, except 3, SCZ patients were taking atypical antipsychotics in monotherapy, but at the time of the TMS measurements, no patients had had a continuous treatment lasting longer than 6 weeks. | N/A | supra-threshold TS (MT1)<br>SICI and ICF: CS intensity = 80% RMT, TS intensity = SI-1 mV; ISI = 3 (SICI), 7 and 15 (ICF) ms. For CSP, data recorded from the FDI muscle under voluntary contraction with 25% to 30% maximum force while stimulating M1 with 120% RMT | left M1 | MEP size evoked by SI-1 mV; RMT; SICI; ICF; CSP duration | SI-1 mV-MEPs differed significantly across groups, the at-risk patients had smaller 1 mV-MEPs than 1st-episode patients and HCs, but no difference between HCs and 1st-episode patients. SICI differed significantly across groups, the at-risk and 1st-episode patients had less inhibition than HCs, but no difference between the at-risk and 1st-episode groups. CSP duration differed significantly across groups, 1st-episode patients had higher CSP duration than the prodromal and HC group, but no difference between the latter 2. No significant difference in ICF among groups. | In the 1st-episode patients, no correlations between SICI and ICF with PANSS scores, or between SICI, ICF, CSP duration with CPZ equivalent dose; CSP duration positively correlated with PANSS total and GAF scores. In the prodromal group, RMT negatively correlated with the positive symptom scores from the PANSS and Structured Interview for Prodromal Symptoms (SIPS), and CSP duration negatively correlated with PANSS |
|---------------------|-----------------|-------------------------------------------------------------------|-----------------------------------------------------|-----|-------------------------------------|------------------------------------------------------------------------------------------------------------------------------------------------------------------------------------------------------------------------------------------------------------------------------------------------------|-----|----------------------------------------------------------------------------------------------------------------------------------------------------------------------------------------------------------------------------------------------------------------------|---------|----------------------------------------------------------|----------------------------------------------------------------------------------------------------------------------------------------------------------------------------------------------------------------------------------------------------------------------------------------------------------------------------------------------------------------------------------------------------------------------------------------------------------------------------------------------------------------------------------------------------------------------------------------------|-----------------------------------------------------------------------------------------------------------------------------------------------------------------------------------------------------------------------------------------------------------------------------------------------------------------------------------------------------------------------------------------------------------------------------------|

|                      |                 |                              |                              |                              |       |                              |                                                                                       |                              |         |                                                                                                                                                                                                                                                                                                                                                                                      |                                                                                                                                                                                                                                                                                                                                                                                                                |                                                                                                                                                                                                                                                                                           |
|----------------------|-----------------|------------------------------|------------------------------|------------------------------|-------|------------------------------|---------------------------------------------------------------------------------------|------------------------------|---------|--------------------------------------------------------------------------------------------------------------------------------------------------------------------------------------------------------------------------------------------------------------------------------------------------------------------------------------------------------------------------------------|----------------------------------------------------------------------------------------------------------------------------------------------------------------------------------------------------------------------------------------------------------------------------------------------------------------------------------------------------------------------------------------------------------------|-------------------------------------------------------------------------------------------------------------------------------------------------------------------------------------------------------------------------------------------------------------------------------------------|
|                      |                 |                              |                              |                              |       |                              |                                                                                       |                              |         |                                                                                                                                                                                                                                                                                                                                                                                      | negative, general psychopathology and total scores. However, the detected correlations did not survive correction for multiple comparisons.                                                                                                                                                                                                                                                                    |                                                                                                                                                                                                                                                                                           |
| Mehta et al. (2014b) | cross-sectional | Same as Mehta et al. (2014a) | Same as Mehta et al. (2014a) | Same as Mehta et al. (2014a) | PANSS | Same as Mehta et al. (2014a) | 3 conditions: "rest" state, actual action observation, and virtual action observation | Same as Mehta et al. (2014a) | left M1 | MEPs amplitude; SICI and LICI (conditioned MEP / non-conditioned MEP) × 100. For single-pulse paradigms, the difference in MEPs between rest and action observation states (averaged across virtual and actual action observation conditions) formed the measure of putative MNA; for paired-pulse paradigms, the difference in cortical inhibition (SICI and LICI) between rest and | In HCs, MEPs amplitude was significantly higher during action observation than rest state for 120% RMT and SI-1mV, and SICI was reduced during action observation. In contrast, antipsychotic-naive patients showed no significant difference between rest and action-observation states for 120% RMT, SI-1mV and SICI. In medicated patients, MEPs amplitude (for SI-1 mV) was increased and SICI was reduced | In the medication-naive group, MNA measured using 120% RMT, SI-1mV and SICI were positively correlated with the ToM index. In the pooled patients group, MNA measured using SICI, SI-1mV and 120% RMT were positively correlated with the ToM index, and MNA measured using SICI was also |

|                                                                           |                                                                                                                                                                                                                                                                                                                                                                                                                                             |                                                                          |
|---------------------------------------------------------------------------|---------------------------------------------------------------------------------------------------------------------------------------------------------------------------------------------------------------------------------------------------------------------------------------------------------------------------------------------------------------------------------------------------------------------------------------------|--------------------------------------------------------------------------|
| action-<br>observation<br>states formed<br>the measure of<br>putative MNA | during action<br>observation. LICI<br>did not showed<br>modulation by<br>action observation<br>in any of these<br>groups. Further,<br>med-naive<br>patients showed<br>less MNA<br>compared to HCs<br>and medicated<br>patients for all<br>measures except<br>LICI; and<br>medicated patients<br>had higher MNA<br>during action<br>observation for<br>SI-1mV-MEP and<br>SICI. No<br>difference in<br>MNA for LICI<br>among the 3<br>groups. | positively<br>correlated<br>with the<br>emotion<br>recognition<br>index. |
|---------------------------------------------------------------------------|---------------------------------------------------------------------------------------------------------------------------------------------------------------------------------------------------------------------------------------------------------------------------------------------------------------------------------------------------------------------------------------------------------------------------------------------|--------------------------------------------------------------------------|

---

Abbreviations: SCZ = schizophrenia or schizoaffective disorder; HCs = healthy controls; ISI = interstimulus interval; ITI = intertrial interval; CS = conditioning stimulus; TS = test stimulus; M1= primary motor cortex

Table 2. Studies including TMS-EEG outcomes

| Study                    | Design          | Number of patients (N of males) | Patient characteristics |                                    |                                    |                                                              | Task | TMS protocol                                                                                                                                                     | Stimulation site                                                                | Masking sound or sham TMS | Measures of cortical excitability                                                                                                          | Summary of findings                                                                                                                                                                                                                                                                                                                                                                           |                                                                             |
|--------------------------|-----------------|---------------------------------|-------------------------|------------------------------------|------------------------------------|--------------------------------------------------------------|------|------------------------------------------------------------------------------------------------------------------------------------------------------------------|---------------------------------------------------------------------------------|---------------------------|--------------------------------------------------------------------------------------------------------------------------------------------|-----------------------------------------------------------------------------------------------------------------------------------------------------------------------------------------------------------------------------------------------------------------------------------------------------------------------------------------------------------------------------------------------|-----------------------------------------------------------------------------|
|                          |                 |                                 | Age (years) (mean±SD)   | Illness duration (years) (mean±SD) | Clinical characteristics (mean±SD) | Medications                                                  |      |                                                                                                                                                                  |                                                                                 |                           |                                                                                                                                            | Between-group (or time point) comparisons                                                                                                                                                                                                                                                                                                                                                     | Correlations                                                                |
| Ferrarelli et al. (2008) | cross-sectional | 16 (13 M)                       | 33.5±8                  | 11.1±6.4                           | N/A                                | 14 were on 2nd-generation antipsychotics; 2 were unmedicated | N/A  | The brain was stimulated using single-pulse stimuli at an intensity that generated an intracranial electric field of 120 V/m (suprathreshold), ISI = 0.5~0.7 Hz. | right premotor cortex, the coordinates of the stimulation site was not provided | Played masking noise      | RMT; global mean field power (GMFP); event-related spectral perturbation (ERSP) and intertrial coherence (ITC) in the gamma band (30~50Hz) | No significant difference in RMT between patients and HCs. GMFP was decreased in patients between 12 and 100 ms post-stimulus relative to HCs, and the biggest decrease occurred at 22 and 55ms in several fronto-central electrodes. ERSP was significantly reduced in patients between 12~100 ms post-TMS in 4 fronto-central channels (including Cz and FC2) close to the TMS stimulation. | ERSP and ITC was not correlated with duration of illness or medication dose |

|                      |                 |                                                                                              |                                         |                                          |       |                                                                                                                                                                                                                     |     |                                                                                                                                                                                       |                                                                                        |                      |                                                                                                                                                                                              |                                                                                                                                                                                                                                                                 |                                                                                                                                |
|----------------------|-----------------|----------------------------------------------------------------------------------------------|-----------------------------------------|------------------------------------------|-------|---------------------------------------------------------------------------------------------------------------------------------------------------------------------------------------------------------------------|-----|---------------------------------------------------------------------------------------------------------------------------------------------------------------------------------------|----------------------------------------------------------------------------------------|----------------------|----------------------------------------------------------------------------------------------------------------------------------------------------------------------------------------------|-----------------------------------------------------------------------------------------------------------------------------------------------------------------------------------------------------------------------------------------------------------------|--------------------------------------------------------------------------------------------------------------------------------|
|                      |                 |                                                                                              |                                         |                                          |       |                                                                                                                                                                                                                     |     |                                                                                                                                                                                       |                                                                                        |                      |                                                                                                                                                                                              | ITC was significantly reduced in patients within the first 100 ms in 5 fronto-central electrodes (same fronto-central region that showed GMFP and ERSP gamma reduction, including Cz and FC2).                                                                  |                                                                                                                                |
| Canali et al. (2015) | cross-sectional | 12 (9 M) with SCZ; 12 (2 M) with bipolar disorder (BPD); 12 (4 M) with major depression (MD) | 38 ± 9 (SCZ); 36 ± 7 (BPD); 46 ± 8 (MD) | 13 ± 6 (SCZ); 11 ± 9 (BPD); 18 ± 10 (MD) | PANSS | 6 BPD were taking lithium salts. All MD were on antidepressant treatment, 8 of them also on benzodiazepines and 3 of them also on mood stabilizers. SCZ patients were taking antipsychotics (5 typical, 7 atypical) | N/A | Intensity of TMS-induced electric field was always > 90 V/m for each participant, delivered at a frequency randomly jittered between 1.5 and 1.8 sec (equivalent to about 0.5~0.6 Hz) | left premotor area (Brodmann area 6), the coordinates of stimulation site not provided | Played masking noise | ERSP in 8~50 Hz (1 Hz bin resolution), measured at the channel closest to the stimulation site. Natural frequency was defined as the frequency bin with the largest cumulated ERSP over time | TMS significantly activated the beta/gamma band response (range 21–50 Hz) in HCs between 20~300 ms post-TMS. The frequencies were significantly reduced in patients with bipolar disorder, major depression and SCZ (range 11–27 Hz). Frontal natural frequency | No significant correlations between natural frequencies and PANSS scores, or between natural frequencies and medication doses. |

|                      |                 |                                       |                                      |                                  |       |                                                                                                                                                                                                                      |     |                                                                                                                                                                                                                                   |                                                                                           |                                                                                                                                                                                                                                              |                                                                                                                                                                                                                                                                                                                                                                                             |                                                                                                                                                                                                                                                                                                                                                                                                              |                                                                                                                                                                        |
|----------------------|-----------------|---------------------------------------|--------------------------------------|----------------------------------|-------|----------------------------------------------------------------------------------------------------------------------------------------------------------------------------------------------------------------------|-----|-----------------------------------------------------------------------------------------------------------------------------------------------------------------------------------------------------------------------------------|-------------------------------------------------------------------------------------------|----------------------------------------------------------------------------------------------------------------------------------------------------------------------------------------------------------------------------------------------|---------------------------------------------------------------------------------------------------------------------------------------------------------------------------------------------------------------------------------------------------------------------------------------------------------------------------------------------------------------------------------------------|--------------------------------------------------------------------------------------------------------------------------------------------------------------------------------------------------------------------------------------------------------------------------------------------------------------------------------------------------------------------------------------------------------------|------------------------------------------------------------------------------------------------------------------------------------------------------------------------|
|                      |                 |                                       |                                      |                                  |       |                                                                                                                                                                                                                      |     |                                                                                                                                                                                                                                   |                                                                                           |                                                                                                                                                                                                                                              |                                                                                                                                                                                                                                                                                                                                                                                             | was significantly reduced in the patient groups compared with HCs but did not differ among the patient groups themselves.                                                                                                                                                                                                                                                                                    |                                                                                                                                                                        |
| Farzan et al. (2010) | cross-sectional | 14 (10 M) with SCZ; 14 (9 M) with BPD | 37.5 ± 10.4 (SCZ); 32.6 ± 13.4 (BPD) | 9.8 ± 7.3 (SCZ); 7.7 ± 9.3 (BPD) | PANSS | 2 SCZ patients were unmedicated (1 medication-naïve and 1 medication-free for 6 months) and 12 were on medication (clozapine, n = 5; risperidone, n = 3; haloperidol, n = 2; quetiapine, n = 1; perphenazine, n = 1) | N/A | LICI: CS = TS = intensity adjusted to produce mean peak-to-peak MEP of 1 mV, this corresponded to 65.8 ± 17.1% of stimulator output in patients with SCZ, 72.1 ± 15.2% in BPD, and 62.8 ± 11.8% in HCs; ISI = 100 ms, ITI = 5 sec | left M1 (optimal site for APB activation) and DLPFC (Talairach coordinates = -50, 30, 36) | Sham stimulation was administered using the same parameters as the active stimulation over the DLPFC and motor cortex (it preserved the auditory stimulation produced by TMS clicks) to control for the effect of auditory evoked potentials | Inhibition = [1 - area under rectified curve (conditioned) / area under rectified curve (unconditioned)] X 100. EEG data were decomposed into 5 frequency bands: delta (1–3.5 Hz), $\theta$ (4–7 Hz), $\alpha$ (8–12 Hz), $\beta$ (12.5–28 Hz) and $\gamma$ (30–50 Hz) and for each frequency band inhibition was obtained through the equation above, time of interest = 50~150 ms post-TS | Motor cortex (LICI at C3): inhibition in the $\gamma$ band did not significantly differ among the 3 groups. DLPFC (LICI at AF3): SCZ patients had significantly lower inhibition in the $\gamma$ band compared to BPD patients and HCs. No difference among groups for other frequency bands in motor cortex and DLPFC. No significant difference in the response to TS alone among groups for any frequency | No significant correlation between CI $\gamma$ and medication dose (converted chlorpromazine equivalents) in SCZ and BPD patients treated with antipsychotics (n = 19) |

|                         |                 |           |             |           |       |                                                                                                                                                                                                              |     |                                                                                                               |         |                                                                                                                                                                                                                                                                      |                                                                                                                                                                                                                                                               |                                                                                                                                                                                                                                                                                                                       |                                                                                                                                                                                                                                                                                                           |
|-------------------------|-----------------|-----------|-------------|-----------|-------|--------------------------------------------------------------------------------------------------------------------------------------------------------------------------------------------------------------|-----|---------------------------------------------------------------------------------------------------------------|---------|----------------------------------------------------------------------------------------------------------------------------------------------------------------------------------------------------------------------------------------------------------------------|---------------------------------------------------------------------------------------------------------------------------------------------------------------------------------------------------------------------------------------------------------------|-----------------------------------------------------------------------------------------------------------------------------------------------------------------------------------------------------------------------------------------------------------------------------------------------------------------------|-----------------------------------------------------------------------------------------------------------------------------------------------------------------------------------------------------------------------------------------------------------------------------------------------------------|
|                         |                 |           |             |           |       |                                                                                                                                                                                                              |     |                                                                                                               |         |                                                                                                                                                                                                                                                                      | band. In all groups, level of suppression did not change after controlling for the effect of auditory evoked potentials in the DLPFC or M1.                                                                                                                   |                                                                                                                                                                                                                                                                                                                       |                                                                                                                                                                                                                                                                                                           |
| Frantseva et al. (2014) | cross-sectional | 16 (12 M) | 36.7 ± 10.4 | 9.7 ± 7.3 | PANSS | 14 patients were medicated (clozapine, n = 6; risperidone, n = 3; haloperidol, n = 2; quetiapine, n = 1; perphenazine, n = 1; olanzapine, n = 1), with no other psychotropic medications; 2 were unmedicated | N/A | Intensity of single-pulse stimuli set to produce mean MEP amplitude of 1 mV peak-to-peak at rest, ISI = 5 sec | left M1 | To control for the effect of TMS induced auditory evoked potentials, single-pulse sham-stimulation was given to all participants at the same intensity as used for active stimulation but with the coil angled at 90° from the scalp resting on one wing of the coil | Average global voltage (estimated as a surface area under the rectified EEG traces across all electrodes for each participant); Time-frequency signal power in delta (1–3.5 Hz), theta (4–7 Hz), alpha (8–12 Hz), beta (12–28 Hz), and gamma (30–50 Hz) bands | No significant difference in RMT and stimulus intensity between patients and HCs. Patients had significantly higher average global voltage than HCs between 400~750 ms post stimulus, but no difference in 75~150 ms. Patients also showed higher absolute signal voltage than HCs on topographic plots at around 200 | Positive PANSS score was positively correlated with the time-varying maximum gamma power (total power averaged across 60 electrodes for each participant for the time period of interest) between 400~700 ms. Negative PANSS score was positively correlated with maximum theta and delta power at 200 ms |

ms and  
between  
400~750 ms,  
and  
subtracting  
sham-EEG  
signal from  
active TMS-  
EEG signal  
did not  
diminish the  
difference  
statistically.  
The  
topography  
plots suggest  
that patients  
experienced  
more  
prolonged  
and  
widespread  
activation in  
response to  
TMS. Patients  
showed  
significantly  
increased  
signal power  
between  
400~800 ms  
in delta band  
in ipsilateral  
frontal and  
temporo-  
parietal leads  
and in  
bilateral  
occipital and  
parietal  
electrodes;  
and in beta-

|                    |                 |          |         |     |                                                                                                              |                                                                                                                                                                         |     |                                                                        |                                                                                                            |          |                                                                                                                                                                                                                                                                                                                                                                                                                                                             |                                                                                                                                                                                                                                                                                                                                                     |                                                                                                                                                                                                                                                                                                                                                                                                         |
|--------------------|-----------------|----------|---------|-----|--------------------------------------------------------------------------------------------------------------|-------------------------------------------------------------------------------------------------------------------------------------------------------------------------|-----|------------------------------------------------------------------------|------------------------------------------------------------------------------------------------------------|----------|-------------------------------------------------------------------------------------------------------------------------------------------------------------------------------------------------------------------------------------------------------------------------------------------------------------------------------------------------------------------------------------------------------------------------------------------------------------|-----------------------------------------------------------------------------------------------------------------------------------------------------------------------------------------------------------------------------------------------------------------------------------------------------------------------------------------------------|---------------------------------------------------------------------------------------------------------------------------------------------------------------------------------------------------------------------------------------------------------------------------------------------------------------------------------------------------------------------------------------------------------|
|                    |                 |          |         |     |                                                                                                              |                                                                                                                                                                         |     |                                                                        |                                                                                                            |          | gamma band in ipsilateral (C3, C5, CP3, CP5, P3, P5, and P7) and contralateral channels (F8, FT8, FC6, C6, CP6, and T8).                                                                                                                                                                                                                                                                                                                                    |                                                                                                                                                                                                                                                                                                                                                     |                                                                                                                                                                                                                                                                                                                                                                                                         |
| Noda et al. (2017) | cross-sectional | 12 (8 M) | 41 ± 10 | N/A | Patients were clinically stable determined by the PANSS score of ≤ 70. 11/12 patients interviewed with PANSS | Patients were on a stable dose of antipsychotic medications for at least one month, and were not taking anticholinergic drugs, benzodiazepines, or glutamate modulators | N/A | SICI & ICF: CS = 80% RMT, TS = SI-1 mV, ISI = 2 (SICI) and 10 (ICF) ms | Left DLPFC, the target was individually determined based on the EEG cap navigated F5 electrode site method | not used | Modulation of TEPs amplitudes by SICI & ICF in the DLPFC ROI: the TEP components were P30, N45, P60, N100 and P180, change in TEP (absolute change in amplitude) = conditioned amplitude minus unconditioned amplitude. The left DLPFC ROI was defined as electrodes Fp1, AF3, AF7, F1, F3, F5, F7, FC1, FC3 and FC7. Modulation of frequency band powers by SICI & ICF in delta (1–3 Hz), theta (4–7 Hz), alpha (8–14 Hz), beta (14–30 Hz), and gamma (30– | In both patients and HCs, P60 amplitude was significantly reduced by SICI, but the reduction was smaller in patients. P60 and N100 were significantly changed (amplitudes became more positive) following ICF in HCs, but no TEP amplitudes were increased by ICF in patients. Topography plots of TEPs showed that in HCs, SICI reduced excitation | No correlation between CPZ equivalent dose and the clinical or cognitive measures; and no correlation between the CPZ equivalent dose and the modulation of TEP components induced by SICI and ICF. Change in N100 amplitude by ICF was positively correlated with PANSS total score; change in P60 amplitude by SICI was negatively correlated with the longest span of the Letter-Number Span Test in |

50 Hz) bands: over the patients. No  
change in power frontal area significant  
(as a ratio) for on P60, correlation  
each frequency whereas ICF with the other  
band = increased cognitive tests  
conditioned excitation scores  
power / over the left (Wechsler Test  
unconditioned frontal area of Adult  
power. Time- on P60 (i.e. Reading,  
frequency more Letter-Number  
analysis for excitatory Span Test, the  
SICI & ICF: modulation) Trail Making  
ERSP and N100 (i.e. Test Parts A &  
less B, and Hopkins  
inhibition); in Verbal  
patients, the Learning Test)  
topographical in patients.  
changes are  
poor. Patients  
showed  
significantly  
less inhibitory  
modulation  
(i.e. higher  
conditioned /  
unconditioned  
power ratio)  
than HCs on  
delta  
frequency  
band by SICI  
in left  
DLPFC. No  
significant  
difference in  
modulations  
on any  
frequency  
bands with  
ICF in left  
DLPFC  
between

|                     |                 |                                                                       |                          |     |                                       |                                                                                                                                          |     |                                                                                                                                                                                                                                       |                                                           |          |                                                                                                                                                                                                                                                                                                           |                                                                                                                                                |                                                                                                                                                                                 |
|---------------------|-----------------|-----------------------------------------------------------------------|--------------------------|-----|---------------------------------------|------------------------------------------------------------------------------------------------------------------------------------------|-----|---------------------------------------------------------------------------------------------------------------------------------------------------------------------------------------------------------------------------------------|-----------------------------------------------------------|----------|-----------------------------------------------------------------------------------------------------------------------------------------------------------------------------------------------------------------------------------------------------------------------------------------------------------|------------------------------------------------------------------------------------------------------------------------------------------------|---------------------------------------------------------------------------------------------------------------------------------------------------------------------------------|
|                     |                 |                                                                       |                          |     |                                       |                                                                                                                                          |     |                                                                                                                                                                                                                                       |                                                           |          | groups. Time-frequency plot showed that HCs had significantly more inhibitory modulations during SICI (conditioned minus unconditioned power was more negative in HCs) and more facilitatory modulations during ICF (conditioned minus unconditioned power was more positive in HCs) compared to patients |                                                                                                                                                |                                                                                                                                                                                 |
| Radhu et al. (2015) | cross-sectional | 38 with SCZ (25 M); 27 (11M) with obsessive compulsive disorder (OCD) | 35.71 (SCZ); 36.15 (OCD) | N/A | Brief Psychiatric Rating Scale (BPRS) | SCZ patients were taking a variety of antipsychotics, antidepressants, mood stabilizers and/or benzodiazepines, 11 were taking clozapine | N/A | LICI: ISI = 100 ms, ITI = 5 sec, the intensity of both CS and TS were set to elicit an average MEP of 1 mV peak-to-peak upon delivery of 20 pulses over the motor cortex (no significant group difference for the stimulus intensity) | left M1, left DLPFC (Talairach coordinates = -50, 30, 36) | not used | Event-related spectral perturbation (ERSP) ( $\mu V^2/Hz$ ) was computed separately for single pulse and paired pulse conditions, LICI = single pulse minus paired-pulse. The DLPFC ROI includes                                                                                                          | LICI of DLPFC analysed across all groups showed significant within-group inhibition in most channels - lower frequencies tend to show extended | For LICI of DLPFC, negative correlation found between BPRS total score and the size of the largest significant cluster of inhibition, after removing 2 outliers. No correlation |

|                                                                                                                                                                                                                                |                                                                                                                                                                                                                                                                                                                                                                                                                                                                                    |                                                                                                                                          |
|--------------------------------------------------------------------------------------------------------------------------------------------------------------------------------------------------------------------------------|------------------------------------------------------------------------------------------------------------------------------------------------------------------------------------------------------------------------------------------------------------------------------------------------------------------------------------------------------------------------------------------------------------------------------------------------------------------------------------|------------------------------------------------------------------------------------------------------------------------------------------|
| electrodes FP1, FPZ, FP2, AF3, AF4, F7, F5, F3, F1, FZ, F2, F4, F6, F8, FT7, FC5, FC3, FC1, FCZ, FC2, FC4, FC6 and FT8; the M1 ROI includes T7, C5, C3, C1, CZ, C2, C4, C6, T8, TP7, CP5, CP3, CP1, CPZ, CP2, CP4, CP6 and TP8 | inhibition up to ~400 ms post stimulus, whereas higher frequencies show inhibition over narrower or specific temporal regions; (2) overall inhibition (1~50 Hz) was larger in HCs than SCZ, and significant difference between SCZ and OCD; (3) LICI was significantly different between HCs and SCZ in theta, alpha, beta and gamma bands, and significantly different between SCZ and OCD in theta and alpha bands. In the DLPFC ROI, overall inhibition (1~50 Hz) was larger in | between the size of largest cluster of inhibition (LICI of DLPFC) and CPZ equivalents in SCZ patients treated with antipsychotics (n=38) |
|--------------------------------------------------------------------------------------------------------------------------------------------------------------------------------------------------------------------------------|------------------------------------------------------------------------------------------------------------------------------------------------------------------------------------------------------------------------------------------------------------------------------------------------------------------------------------------------------------------------------------------------------------------------------------------------------------------------------------|------------------------------------------------------------------------------------------------------------------------------------------|

HCs than in SCZ as well as in all frequency bands, and significant difference between SCZ and OCD in overall inhibition, theta, alpha and beta bands. LICI of M1 analysed across all channels: (1) all groups showed within-group inhibition and no difference between any groups across all frequency bands; (2) time-frequency plots showed inhibition in most channels in all 3 groups. In the M1 ROI, no significant difference between any groups across all frequency bands.

|                     |                 |                                                                           |                              |     |                                       |                                                                                                                                     |     |                                                                                                                         |                                                           |          |                                                                                                                                                                                                                                                                              |                                                                                                                                                                                                                                                                                                                                                       |                                                                                                                                                                                                                             |
|---------------------|-----------------|---------------------------------------------------------------------------|------------------------------|-----|---------------------------------------|-------------------------------------------------------------------------------------------------------------------------------------|-----|-------------------------------------------------------------------------------------------------------------------------|-----------------------------------------------------------|----------|------------------------------------------------------------------------------------------------------------------------------------------------------------------------------------------------------------------------------------------------------------------------------|-------------------------------------------------------------------------------------------------------------------------------------------------------------------------------------------------------------------------------------------------------------------------------------------------------------------------------------------------------|-----------------------------------------------------------------------------------------------------------------------------------------------------------------------------------------------------------------------------|
| Radhu et al. (2017) | cross-sectional | 19 with SCZ (10 M); 30 first-degree relatives of patients with SCZ (13 M) | 30.2 (SCZ); 53.8 (relatives) | N/A | Brief Psychiatric Rating Scale (BPRS) | Patients were taking a variety of antipsychotics, antidepressants, mood stabilisers and/or benzodiazepines, 9 were taking clozapine | N/A | LICI: ISI = 100 ms, ITI = 5 sec, the intensity of both CS and TS were set to elicit an average MEP of 1 mV peak-to-peak | left M1; left DLPFC (Talairach coordinates = -50, 30, 36) | not used | ERSP was computed independently for the single-pulse and paired-pulse conditions, inhibition = power of single pulse minus power of paired pulse. 9 electrodes were used for the analysis of inhibition (F1, Fz, F2, FC1, FCz, FC2, C1, Cz, C2) for DLPFC and M1 stimulation | LICI of DLPFC: for overall inhibition (2~50 Hz), HCs = unaffected first-degree relatives > SCZ patients; for gamma (30~50 Hz) inhibition, HCs > SCZ but no difference between HCs and relatives or between relatives and SCZ. LICI of M1: no significant difference between any groups in overall (2–50 Hz) or gamma (30–50 Hz) inhibition in the ROI | For LICI of DLPFC, no significant correlation between overall inhibition and CPZ equivalent, or between gamma inhibition and CPZ equivalent; no significant relationship between BPRS score and overall or gamma inhibition |
|---------------------|-----------------|---------------------------------------------------------------------------|------------------------------|-----|---------------------------------------|-------------------------------------------------------------------------------------------------------------------------------------|-----|-------------------------------------------------------------------------------------------------------------------------|-----------------------------------------------------------|----------|------------------------------------------------------------------------------------------------------------------------------------------------------------------------------------------------------------------------------------------------------------------------------|-------------------------------------------------------------------------------------------------------------------------------------------------------------------------------------------------------------------------------------------------------------------------------------------------------------------------------------------------------|-----------------------------------------------------------------------------------------------------------------------------------------------------------------------------------------------------------------------------|

|                          |                 |                                                 |            |     |                                                                              |                                                                                                                                                                                       |     |                                                                           |                                                                                                                                                                                        |                      |                                                                                                                                                                                                                                                                                         |                                                                                                                                                                                                                                                                                                                                                                                                                |                                                                                                                                                                      |
|--------------------------|-----------------|-------------------------------------------------|------------|-----|------------------------------------------------------------------------------|---------------------------------------------------------------------------------------------------------------------------------------------------------------------------------------|-----|---------------------------------------------------------------------------|----------------------------------------------------------------------------------------------------------------------------------------------------------------------------------------|----------------------|-----------------------------------------------------------------------------------------------------------------------------------------------------------------------------------------------------------------------------------------------------------------------------------------|----------------------------------------------------------------------------------------------------------------------------------------------------------------------------------------------------------------------------------------------------------------------------------------------------------------------------------------------------------------------------------------------------------------|----------------------------------------------------------------------------------------------------------------------------------------------------------------------|
| Ferrarelli et al. (2019) | cross-sectional | 16 (12 M) patients with first-episode psychosis | 22.5 ± 5.2 | N/A | Scale for the Assessment of the Positive and Negative Symptoms (SAP and SAN) | FEP patients had no more than 2 months of lifetime antipsychotic treatment: 9 were antipsychotic naïve, 7 had <1 month exposure to antipsychotic medications at the time of the study | N/A | intensity of single pulses = 110% RMT, stimuli delivered at 0.4 to 0.6 Hz | left M1 (targeted a motor region adjacent to the hand area to ensure that no hand movement was observed in or reported by any participant to avoid re-afferent somatosensory activity) | Played masking noise | RMT (measured in the right FDI muscle); GMFP; ERSP and ITC were averaged between 8~45 Hz and 20~300 ms; the power spectra were also expressed as the % of power in a given frequency, called the relative spectral power (RSP). Clustering analysis was performed for ERSP, ITC and RSP | No significant difference in RMT between FEP and HCs. GMFP did not differ between groups. ITC and ERSP (p=0.0524) were decreased in FEP at trend level significance at electrodes FCz and C1 for the frequency band 28~42 Hz and 26~40 Hz, respectively. FEP showed significantly decreased RSP than the HCs in the 27~33 Hz range (beta/low gamma) in a cluster of fronto-central electrodes overlying the M1 | No correlation between TMS-evoked EEG parameters (ERSP, ITC) and CPZ equivalent dose in medicated FEP patients. No correlation between ERSP, ITC and clinical scores |
|--------------------------|-----------------|-------------------------------------------------|------------|-----|------------------------------------------------------------------------------|---------------------------------------------------------------------------------------------------------------------------------------------------------------------------------------|-----|---------------------------------------------------------------------------|----------------------------------------------------------------------------------------------------------------------------------------------------------------------------------------|----------------------|-----------------------------------------------------------------------------------------------------------------------------------------------------------------------------------------------------------------------------------------------------------------------------------------|----------------------------------------------------------------------------------------------------------------------------------------------------------------------------------------------------------------------------------------------------------------------------------------------------------------------------------------------------------------------------------------------------------------|----------------------------------------------------------------------------------------------------------------------------------------------------------------------|

|                    |                 |          |        |     |       |                                                                                                                                                                                        |     |                                                                                                                                                                                                                                                                                                                                                                                                                                                                                                                                                                              |                                                           |          |                                                                                                                                                                                                                                                                                                                              |                                                                                                                                                                                                                                                                                                                                                                                                                                                                           |                                                                                                                                                                                                                                                                                                                                                                                                  |
|--------------------|-----------------|----------|--------|-----|-------|----------------------------------------------------------------------------------------------------------------------------------------------------------------------------------------|-----|------------------------------------------------------------------------------------------------------------------------------------------------------------------------------------------------------------------------------------------------------------------------------------------------------------------------------------------------------------------------------------------------------------------------------------------------------------------------------------------------------------------------------------------------------------------------------|-----------------------------------------------------------|----------|------------------------------------------------------------------------------------------------------------------------------------------------------------------------------------------------------------------------------------------------------------------------------------------------------------------------------|---------------------------------------------------------------------------------------------------------------------------------------------------------------------------------------------------------------------------------------------------------------------------------------------------------------------------------------------------------------------------------------------------------------------------------------------------------------------------|--------------------------------------------------------------------------------------------------------------------------------------------------------------------------------------------------------------------------------------------------------------------------------------------------------------------------------------------------------------------------------------------------|
| Noda et al. (2018) | cross-sectional | 12 (8 M) | 41 ±10 | N/A | PANSS | Patients were on a stable dose of antipsychotic medications for at least 1 month, and no specific anticholinergic drugs or benzodiazepines more than lorazepam equivalent dose of 2 mg | N/A | SAI was delivered at ISIs relative to the somatosensory evoked potential (SSEP) at N20 (SSEP evoked by MNS is a negative deflection measured from somatosensory areas at a latency of about 20 ms). For M1-SAI, ISI = N20 + 2 ms; for DLPFC-SAI, ISI = N20 + 4 ms at the F5 electrode site. ITI = 5 sec, inter-block interval = 5~10 min (block refers to M1 or DLPFC stimulation). The conditioning median nerve stimulation (MNS) intensity was adjusted to 3 times the sensory threshold individually. Intensity of TMS was set to induce 1 mV peak-to-peak MEP amplitude | Left M1 and DLPFC (administered at the F5 electrode site) | not used | MEPs; TEPs (P30, N45, P60, N100, and P180). ROI for left M1 (FC1, FC3, FC5, C1, C3, C5, CP1, CP3, CP5) and DLPFC (Fp1, AF3, AF7, F1, F3, F5, F7, FC1, FC3, FC7). The modulation of TEPs by MNS was calculated as follows: SAI = [amplitude of TEP induced by SAI condition] / [amplitude of TEP induced by single pulse TMS] | Effect of SAI on MEPs: no significant difference in the mean intensity to induce 1 mV peak-to-peak MEP amplitude, or the degree of attenuation by SAI between patients and HCs<br><br>Effect of SAI on TEPs: There was positive modulation (i.e. increased amplitude) of P180 in the M1 in patients and HCs (however, not sure if modulation was significant in the HCs), and there was significant difference in the level of modulation of P180 between patients > HCs. | Negative correlation in patients between modulation of N100 at left DLPFC and executive function as measured with the ratio of Trail Making Test (TMT) part B to part A - bigger modulation of N100 correlated with worse performance. This correlation remained significant after Bonferroni correction, and remained significant after controlling for age as a covariate in this correlation. |
|--------------------|-----------------|----------|--------|-----|-------|----------------------------------------------------------------------------------------------------------------------------------------------------------------------------------------|-----|------------------------------------------------------------------------------------------------------------------------------------------------------------------------------------------------------------------------------------------------------------------------------------------------------------------------------------------------------------------------------------------------------------------------------------------------------------------------------------------------------------------------------------------------------------------------------|-----------------------------------------------------------|----------|------------------------------------------------------------------------------------------------------------------------------------------------------------------------------------------------------------------------------------------------------------------------------------------------------------------------------|---------------------------------------------------------------------------------------------------------------------------------------------------------------------------------------------------------------------------------------------------------------------------------------------------------------------------------------------------------------------------------------------------------------------------------------------------------------------------|--------------------------------------------------------------------------------------------------------------------------------------------------------------------------------------------------------------------------------------------------------------------------------------------------------------------------------------------------------------------------------------------------|

in the right FDI muscle.

DLPFC-SAI:  
 In the DLPFC, N100 became significantly more positive (i.e. amplitude reduced) in patients but the N100 amplitude increased in HCs, and there was significant group difference in modulation of N100, with patients < HCs

|                    |                 |                                                         |     |     |     |     |     |                                                                                                                                                        |                                                  |          |                                                                                                                                                                                                                                          |                                                                                                                                                                                                                    |
|--------------------|-----------------|---------------------------------------------------------|-----|-----|-----|-----|-----|--------------------------------------------------------------------------------------------------------------------------------------------------------|--------------------------------------------------|----------|------------------------------------------------------------------------------------------------------------------------------------------------------------------------------------------------------------------------------------------|--------------------------------------------------------------------------------------------------------------------------------------------------------------------------------------------------------------------|
| Lett et al. (2016) | cross-sectional | 23 (a subgroup of the patients from Radhu et al., 2015) | N/A | N/A | N/A | N/A | N/A | LICI: TS = CS = intensity that elicited an average MEP of 1 mV peak-to-peak upon delivery of 20 pulses over the motor cortex, ISI = 100ms, ITI = 5 sec | left DLPFC (Talairach coordinates = -50, 30, 36) | not used | LICI was assessed by comparing single-pulse versus paired-pulse conditions. The number of significant voxels within the biggest cluster of inhibition was calculated for every participant, which was used to reflect the degree of LICI | 23 patients and 33 HCs completed the TMS-EEG and genetic protocols: In the DLPFC, GAD1 T-allele (the "risk genotype") carriers predicted greater LICI cluster size in HCs and lower LICI cluster size in patients. |
|--------------------|-----------------|---------------------------------------------------------|-----|-----|-----|-----|-----|--------------------------------------------------------------------------------------------------------------------------------------------------------|--------------------------------------------------|----------|------------------------------------------------------------------------------------------------------------------------------------------------------------------------------------------------------------------------------------------|--------------------------------------------------------------------------------------------------------------------------------------------------------------------------------------------------------------------|

|                                                                                                              |                                                                                                                                                                                                                                                                |
|--------------------------------------------------------------------------------------------------------------|----------------------------------------------------------------------------------------------------------------------------------------------------------------------------------------------------------------------------------------------------------------|
| after DLPFC stimulation. LICI was assessed at frequencies ranging from 1~50 Hz using cluster-based analysis. | Another sample completed cognitive tests and genetic protocol: analysis using the general linear model showed that GAD1 genotype was a significant predictor of performance on letter-number span, digit span and Stroop ratio after covarying for age and IQ. |
|--------------------------------------------------------------------------------------------------------------|----------------------------------------------------------------------------------------------------------------------------------------------------------------------------------------------------------------------------------------------------------------|

---

Abbreviations: SCZ = schizophrenia or schizoaffective disorder; HCs = healthy controls; ISI = interstimulus interval; ITI = intertrial interval; CS = conditioning stimulus; TS = test stimulus; M1= primary motor cortex

## RoBANS

|                                                                                                                                      |                                                                                                                                                                                                                                                                                                                                                                                                                                                                                                                                                                                               |
|--------------------------------------------------------------------------------------------------------------------------------------|-----------------------------------------------------------------------------------------------------------------------------------------------------------------------------------------------------------------------------------------------------------------------------------------------------------------------------------------------------------------------------------------------------------------------------------------------------------------------------------------------------------------------------------------------------------------------------------------------|
| <b>1. The selection of participants</b><br>Selection biases caused by the inadequate selection of participants                       |                                                                                                                                                                                                                                                                                                                                                                                                                                                                                                                                                                                               |
| Criteria for judgments of a 'Low risk' of bias                                                                                       | <p><b>Case-control study</b></p> <ul style="list-style-type: none"> <li>The case and control groups were selected from comparable population groups</li> <li>The case group (diagnosis) was clearly defined, with validated diagnostic instrument (e.g. DSM, ICD).</li> <li>It was clearly demonstrated that the control group is not the patient group (i.e. no history of diagnosis of psychotic disorder)</li> </ul> <p><b>Before-after study</b><br/>The study participants were consecutively recruited, and the data were collected prospectively.</p>                                  |
| Criteria for judgments of a 'High risk' of bias<br><br>Any one of the following conditions:                                          | <p><b>Case-control study</b></p> <ul style="list-style-type: none"> <li>The case and control groups are not the comparable population groups.</li> <li>The patient definitions were generated by self-reported or merged data.</li> <li>It was not clearly confirmed that the control group excluded patients.</li> </ul> <p><b>Before-after study</b></p> <ul style="list-style-type: none"> <li>The participants was not recruited consecutively.</li> <li>Retrospective data collection was performed.</li> </ul>                                                                          |
| Criteria for judgments of an 'Unclear risk' of bias                                                                                  | It is uncertain whether the selection of participants resulted in a 'high risk' or a 'low risk' of bias                                                                                                                                                                                                                                                                                                                                                                                                                                                                                       |
| <b>2. Confounding variables</b><br>Selection biases caused by the inadequate confirmation and consideration of confounding variables |                                                                                                                                                                                                                                                                                                                                                                                                                                                                                                                                                                                               |
| Criteria for judgments of a 'Low risk' of bias<br><br>Any one of the following conditions:                                           | <p><b>Non-randomized studies (except for before-after studies)</b></p> <ul style="list-style-type: none"> <li>The major confounding variables (e.g. age, sex or any additional factor) were adequately confirmed and considered during the design phase (e.g. through matching, participation restriction, or other methods).</li> <li>The major confounding variables were adequately confirmed and adjusted for during the analysis phase (e.g. through stratification, propensity score approaches, statistical adjustments, or other methods)</li> </ul> <p><b>Before-after study</b></p> |

|                                                                                                                                |                                                                                                                                                                                                                                                                                                                                                                                                                                                                                                                |
|--------------------------------------------------------------------------------------------------------------------------------|----------------------------------------------------------------------------------------------------------------------------------------------------------------------------------------------------------------------------------------------------------------------------------------------------------------------------------------------------------------------------------------------------------------------------------------------------------------------------------------------------------------|
|                                                                                                                                | A natural progression and learning effect (this effect occurs if past experience improves future execution skills) can be excluded during the consideration of diseases and interventions.                                                                                                                                                                                                                                                                                                                     |
| Criteria for judgments of a 'High risk' of bias<br><br>Any one of the following conditions:                                    | <p><b>Non-randomized study (except for before-after studies)</b></p> <ul style="list-style-type: none"> <li>• The major confounding variables were not considered.</li> <li>• Although the existence of major confounding variables was confirmed, these variables were not adequately considered during the design and analysis phases.</li> </ul> <p><b>Before-after study</b><br/>Natural progression and a learning effect are relatively evident in the considerations of diseases and interventions.</p> |
| Criteria for judgments of an 'Unclear risk' of bias                                                                            | It is uncertain whether the confounding variables resulted in a 'high risk' or a 'low risk' of bias                                                                                                                                                                                                                                                                                                                                                                                                            |
| <p><b>3. Measurement of exposure (intervention)</b><br/>Performance biases caused by inadequate measurements of exposure</p>   |                                                                                                                                                                                                                                                                                                                                                                                                                                                                                                                |
| Criteria for judgments of a 'Low risk' of bias                                                                                 | The experimenter was blinded during collection of exposure data                                                                                                                                                                                                                                                                                                                                                                                                                                                |
| Criteria for judgments of a 'High risk' of bias                                                                                | A clear case of performance bias                                                                                                                                                                                                                                                                                                                                                                                                                                                                               |
| Criteria for judgments of an 'Unclear risk' of bias                                                                            | It is uncertain whether the exposure measurement resulted in a 'high risk' or a 'low risk' of bias                                                                                                                                                                                                                                                                                                                                                                                                             |
| <p><b>4. Blinding of outcome assessments</b><br/>Detection biases caused by the inadequate blinding of outcome assessments</p> |                                                                                                                                                                                                                                                                                                                                                                                                                                                                                                                |
| Criteria for judgments of a 'Low risk' of bias<br><br>Any one of the following conditions:                                     | <ul style="list-style-type: none"> <li>• The outcome assessments were blinded.</li> <li>• Although blinding was not present, its absence was judged to have no effect on the outcome measurements</li> </ul>                                                                                                                                                                                                                                                                                                   |
| Criteria for judgments of a 'High risk' of bias                                                                                | Blinding was not performed or incomplete, and this lack of appropriate blinding appears likely to have affected the outcome measurements.                                                                                                                                                                                                                                                                                                                                                                      |
| Criteria for judgments of an 'Unclear risk' of bias                                                                            | It is uncertain whether the blinding of the outcome assessments resulted in a 'high risk' or a 'low risk' of bias                                                                                                                                                                                                                                                                                                                                                                                              |
| <p><b>5. Incomplete outcome data</b><br/>Attrition biases caused by the inadequate handling of incomplete outcome data</p>     |                                                                                                                                                                                                                                                                                                                                                                                                                                                                                                                |
| Criteria for judgments of a 'Low risk' of bias                                                                                 | <b>Non-randomized studies (except for before-after studies)</b>                                                                                                                                                                                                                                                                                                                                                                                                                                                |

|                                                                                                                                  |                                                                                                                                                                                                                                                                                                                                                                                                                                                                                                                                                                                            |
|----------------------------------------------------------------------------------------------------------------------------------|--------------------------------------------------------------------------------------------------------------------------------------------------------------------------------------------------------------------------------------------------------------------------------------------------------------------------------------------------------------------------------------------------------------------------------------------------------------------------------------------------------------------------------------------------------------------------------------------|
| <p>Any one of the following conditions:</p>                                                                                      | <ul style="list-style-type: none"> <li>• There are no missing data.</li> <li>• The missing data did not affect the study outcomes.</li> <li>• The quantity of missing data was a product of similar developments in both the intervention (exposure) and the control groups, and the causes of these developments are similar.</li> </ul> <p><b>Before-after study</b><br/>                 Information about the number of participants before and after the study exists, and the baseline did not differ with respect to completed and failed study participants.</p>                   |
| <p>Criteria for judgments of a 'High risk' of bias</p> <p>Any one of the following conditions:</p>                               | <p><b>Non-randomized studies (except for before-after studies)</b><br/>                 The missing data could affect the study outcome. These effects may be attributed to the differences in the missing data between the intervention (exposure) group and the control group, or the effects may be caused by the absence of important measurements.</p> <p><b>Before-after study</b><br/>                 Differences exist with respect to the baseline for successful and failed participants</p>                                                                                    |
| <p>Criteria for judgments of an 'Unclear risk' of bias</p>                                                                       | <p>It is uncertain whether the incomplete outcome data resulted in a 'high risk' or a 'low risk' of bias</p>                                                                                                                                                                                                                                                                                                                                                                                                                                                                               |
| <p><b>6. Selective outcome reporting</b><br/>                 Reporting biases caused by the selective reporting of outcomes</p> |                                                                                                                                                                                                                                                                                                                                                                                                                                                                                                                                                                                            |
| <p>Criteria for judgments of a 'Low risk' of bias</p> <p>Any one of the following conditions:</p>                                | <ul style="list-style-type: none"> <li>• The experimental protocol is available, and the pre-defined primary/secondary outcomes were described as planned.</li> <li>• All of the expected outcomes were included in the study descriptions (in the absence of the experimental protocols).</li> </ul>                                                                                                                                                                                                                                                                                      |
| <p>Criteria for judgments of a 'High risk' of bias</p> <p>Any one of the following conditions:</p>                               | <ul style="list-style-type: none"> <li>• The pre-defined primary outcomes were not fully reported. The outcomes were not reported in accordance with the previously defined standards.</li> <li>• Primary outcomes that were not pre-specified in the study existed (except for outcomes with clear explanations, such as unexpected adverse effects).</li> <li>• The existence of incomplete reporting regarding the primary outcome of interest.</li> <li>• The absence of reports on important outcomes that would be expected to be reported for studies in related fields.</li> </ul> |

|                                                     |                                                                                                           |
|-----------------------------------------------------|-----------------------------------------------------------------------------------------------------------|
| Criteria for judgments of an 'Unclear risk' of bias | It is uncertain whether the selective outcome reporting resulted in a 'high risk' or a 'low risk' of bias |
|-----------------------------------------------------|-----------------------------------------------------------------------------------------------------------|

#### Search terms for each database

##### PsycInfo

1. transcranial magnetic stimulation/
2. "transcranial magnetic stimulation".ab.
3. "tms".ab.
4. exp schizophrenia/
5. schizophre\* .ab.
6. "schizoaffective disorder\*" .ab.
7. exp interneurons/
8. exp glutamic acid/
9. exp gamma aminobutyric acid/
10. exp neural inhibition/
11. exp pyramidal neurons/
12. excita\* .ab.
13. inhibit\* .ab.
14. GABA\* .ab.
15. glutam\* .ab.
16. "excitation-inhibition balance" .ab.
17. "E-I balance" .ab.
18. 1 or 2 or 3
19. 4 or 5 or 6
20. 7 or 8 or 9 or 10 or 11 or 12 or 13 or 14 or 15 or 16 or 17
21. 18 and 19 and 20

##### Embase

1. transcranial magnetic stimulation/
2. ("transcranial magnetic stimulation" or "tms").ab.
3. exp schizophrenia/
4. (schizophre\* or "schizoaffective disorder\*").ab.
5. exp interneuron/
6. exp glutamic acid/
7. exp 4 aminobutyric acid/
8. exp nerve cell inhibition/
9. exp pyramidal nerve cell/

10. (excita\* or inhibit\* or GABA\* or glutam\* or "excitation-inhibition balance" or "E-I balance").ab.
11. 1 or 2
12. 3 or 4
13. 5 or 6 or 7 or 8 or 9 or 10
14. 11 and 12 and 13

#### **Medline**

1. transcranial magnetic stimulation/
2. "transcranial magnetic stimulation".ab.
3. "transcranial magnetic stimulation".ab.
4. exp schizophrenia/
5. schizophre\* .ab.
6. "schizoaffective disorder\* ".ab.
7. exp interneurons/
8. exp glutamic acid/
9. exp gamma aminobutyric acid/
10. exp neural inhibition/
11. exp pyramidal neurons/
12. excita\* .ab.
13. inhibit\* .ab.
14. GABA\* .ab.
15. glutam\* .ab.
16. "excitation-inhibition balance" .ab.
17. "E-I balance" .ab.
18. 1 or 2 or 3
19. 4 or 5 or 6
20. 7 or 8 or 9 or 10 or 11 or 12 or 13 or 14 or 15 or 16 or 17
21. 18 and 19 and 20

**Risk of bias assessment**

Table 7. Assessment of bias

| Study                             | Selection of participants | Confounding variables | Measurement of exposure | Blinding of outcome assessment | Incomplete outcome data | Selective reporting |
|-----------------------------------|---------------------------|-----------------------|-------------------------|--------------------------------|-------------------------|---------------------|
| Boroojerdi et al. (1999)          | low                       | low                   | unclear                 | unclear                        | low                     | low                 |
| Chroni et al. (2002)              | low                       | high                  | unclear                 | unclear                        | low                     | low                 |
| Daskalakis et al. (2002)          | low                       | high                  | unclear                 | unclear                        | unclear                 | low                 |
| Fitzgerald et al. (2002a)         | high                      | high                  | unclear                 | low                            | low                     | low                 |
| Fitzgerald et al. (2002b)         | high                      | low                   | low                     | low                            | low                     | low                 |
| Reid et al. (2002)                | low                       | high                  | unclear                 | unclear                        | low                     | low                 |
| Fitzgerald et al. (2003)          | low                       | low                   | low                     | low                            | low                     | low                 |
| Takahashi et al. (2003)           | high                      | low                   | unclear                 | unclear                        | low                     | low                 |
| Bajbouj et al. (2004)             | high                      | low                   | unclear                 | unclear                        | low                     | low                 |
| Fitzgerald et al. (2004)          | low                       | low                   | unclear                 | low                            | low                     | low                 |
| Daskalakis et al. (2008a)         | low                       | high                  | unclear                 | unclear                        | low                     | low                 |
| Daskalakis et al. (2008b)         | low                       | high                  | unclear                 | unclear                        | low                     | low                 |
| Ferrarelli et al. (2008)          | high                      | high                  | unclear                 | unclear                        | low                     | low                 |
| Koch et al. (2008)                | low                       | high                  | unclear                 | unclear                        | low                     | low                 |
| Liu et al. (2009)                 | low                       | low                   | unclear                 | unclear                        | low                     | low                 |
| Farzan et al. (2010)              | high                      | low                   | unclear                 | unclear                        | low                     | low                 |
| Soubasi et al. (2010)             | low                       | low                   | unclear                 | unclear                        | low                     | low                 |
| Hasan et al. (2011)               | low                       | low                   | unclear                 | unclear                        | low                     | low                 |
| Ribolsi et al. (2011)             | low                       | high                  | unclear                 | unclear                        | low                     | low                 |
| Hasan et al. (2012)               | low                       | low                   | unclear                 | unclear                        | low                     | low                 |
| Ahlgren-Rimpilainen et al. (2013) | low                       | low                   | unclear                 | unclear                        | low                     | low                 |
| Frantseva et al. (2014)           | low                       | low                   | unclear                 | unclear                        | low                     | low                 |
| Mehta et al. (2014a)              | low                       | low                   | unclear                 | unclear                        | low                     | low                 |
| Mehta et al. (2014b)              | low                       | low                   | unclear                 | unclear                        | low                     | low                 |
| Tang et al. (2014)                | low                       | low                   | unclear                 | unclear                        | low                     | low                 |
| Yildiz et al. (2015)              | low                       | low                   | low                     | unclear                        | unclear                 | low                 |
| Basavaraju et al. (2015)          | low                       | low                   | unclear                 | unclear                        | low                     | low                 |
| Canali et al. (2015)              | high                      | high                  | unclear                 | unclear                        | low                     | low                 |
| Kaster et al. (2015)              | low                       | low                   | low                     | low                            | unclear                 | low                 |
| Radhu et al. (2015)               | low                       | high                  | unclear                 | unclear                        | low                     | low                 |
| Bridgman et al. (2016)            | low                       | high                  | unclear                 | unclear                        | low                     | low                 |
| Lett et al. (2016)                | low                       | low                   | unclear                 | low                            | low                     | low                 |

|                          |      |      |         |         |         |     |
|--------------------------|------|------|---------|---------|---------|-----|
| Lindberg et al. (2016)   | low  | high | unclear | unclear | unclear | low |
| Strube et al. (2016)     | low  | low  | unclear | unclear | low     | low |
| Ustohal et al. (2017)    | low  | low  | low     | unclear | unclear | low |
| Noda et al. (2017)       | low  | high | unclear | unclear | low     | low |
| Radhu et al. (2017)      | low  | high | unclear | unclear | low     | low |
| Du and Hong (2018)       | low  | high | unclear | unclear | low     | low |
| Ferrarelli et al. (2019) | high | high | unclear | unclear | low     | low |
| Noda et al. (2018)       | low  | high | unclear | unclear | low     | low |
| Bagewadi et al. (2019)   | low  | low  | unclear | unclear | low     | low |
| Du et al. (2019)         | low  | high | unclear | unclear | low     | low |

---
